# Supplementary material
Source: PubMed Central journal article supplement (PMC2547486)
Supplement: NIHMS60311-supplement-SI1.pdf [file NIHMS60311-supplement-SI1.pdf]

# Supporting Information

## **Spectroscopic and Quantum Chemical Studies on low-spin Fe<sup>IV</sup>=O complexes: Fe-O bonding and its contributions to reactivity**

Andrea Decker,<sup>a</sup> Jan-Uwe Rohde,<sup>b</sup> Eric J. Klinker,<sup>b</sup> Shaun D. Wong,<sup>a</sup> Lawrence Que, Jr.<sup>b\*</sup> and Edward I. Solomon<sup>a\*</sup>

*Department of Chemistry, Stanford University, Stanford, California 94305,  
and Department of Chemistry and Center for Metals in Biocatalysis, University of Minnesota,  
Minneapolis, Minnesota 55455*

E-mail: Edward.Solomon@stanford.edu; que@chem.umn.edu

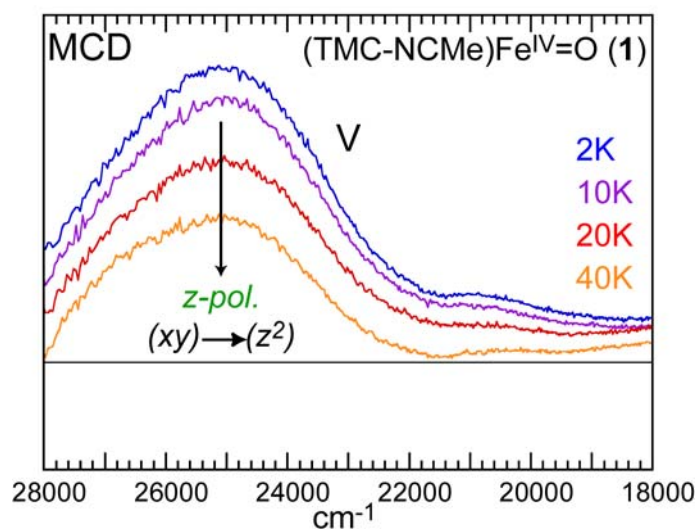

**Figure SI-1:** Variable-temperature MCD spectra at 7T of  $(\text{TMC-NCMe})\text{Fe}^{\text{IV}}=\text{O}$  (**1**) in the energy region from 18,000-28,000  $\text{cm}^{-1}$ .

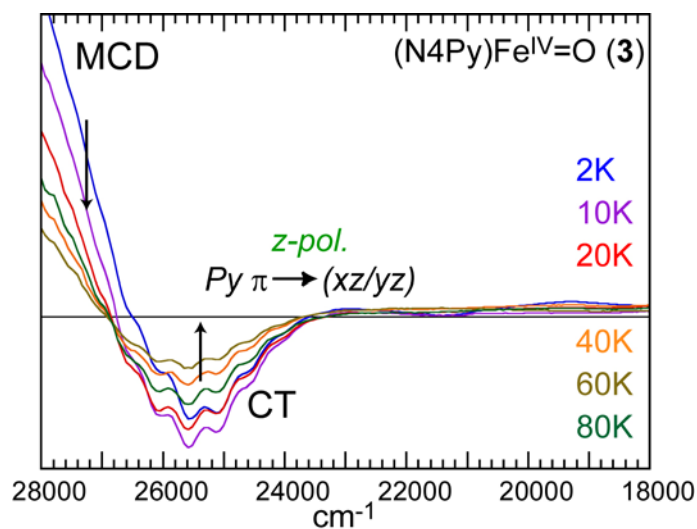

**Figure SI-2:** Variable-temperature MCD spectra at 7T of  $(\text{N4Py})\text{Fe}^{\text{IV}}=\text{O}$  (**3**) in the energy region from 18,000-28,000  $\text{cm}^{-1}$ .

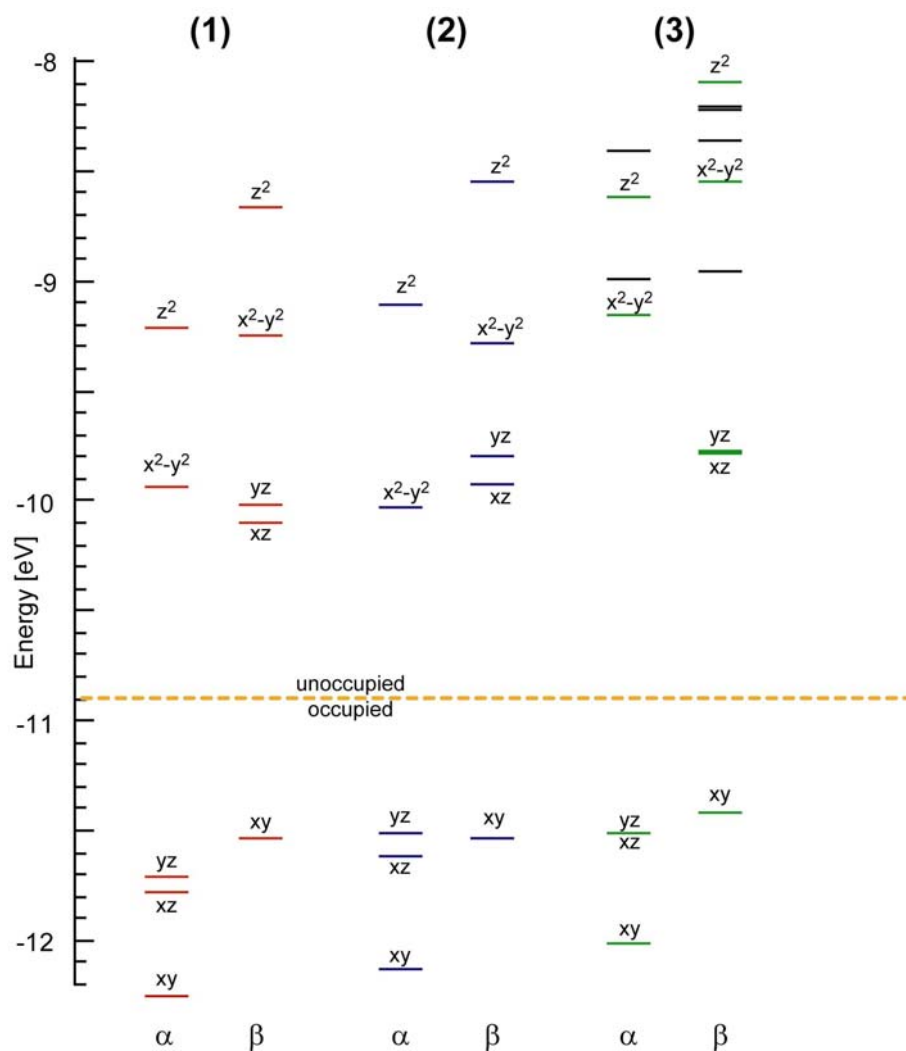

**Figure SI-3:** Energy level diagram of complexes **1**, **2** and **3** (because of a different total charge, the levels of **2** were adjusted to the  $\beta$ -spin d(xy) MO of **1**. The black levels in **3** are pyridine  $\pi^*$  orbitals and not involved in Fe-O interaction. (from Gaussian/BP86 calculations, for details see methodology section 2.4)

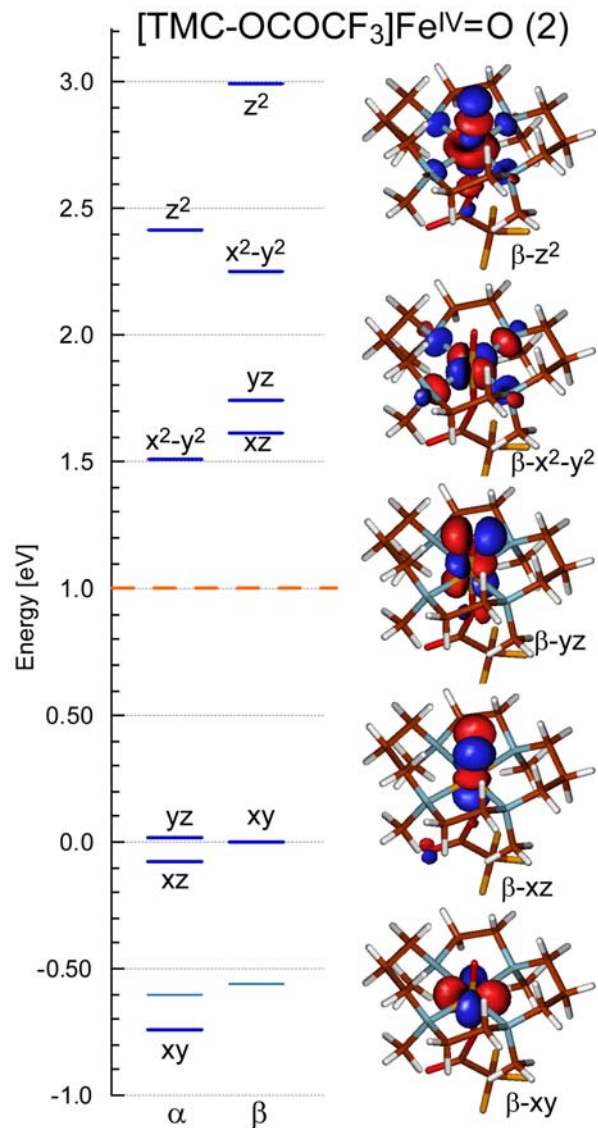

**Figure SI-4:** Energy level diagram and Fe-d based molecular orbitals of complex **2** (from Gaussian/BP86 calculations, for details see methodology section 2.4)

**Table SI-1:** Extended Table 3.3, including other functionals and methods applied

|                        | <b>1</b>     |               |                | <b>2</b>     |               |                | <b>3</b>     |               |                |
|------------------------|--------------|---------------|----------------|--------------|---------------|----------------|--------------|---------------|----------------|
|                        | G03/<br>BP86 | G98/<br>B3LYP | ADF/<br>B88P86 | G03/<br>BP86 | G03/<br>B3LYP | ADF/<br>B88P86 | G03/<br>BP86 | G98/<br>B3LYP | ADF/<br>B88P86 |
| r(Fe-O)                | 1.655        | 1.634         | 1.649          | 1.671        | 1.648         | 1.664          | 1.666        | 1.648         | 1.653          |
| r(Fe-L <sub>ax</sub> ) | 2.123        | 2.162         | 2.112          | 1.977        | 1.976         | 1.994          | 2.071        | 2.073         | 2.086          |
| r(Fe-N <sub>eq</sub> ) | 2.134        | 2.132         | 2.136          | 2.134        | 2.135         | 2.140          | 1.969        | 1.984         | 1.986          |
| v(Fe-O)                | 846          | 894           | --             | 817          | 871           | --             | 829          | 857           | --             |

bond length in [Å], vibrational frequencies in [cm<sup>-1</sup>]

**Table SI-2:** Functional dependence on spin state splitting: Energy difference  $\Delta E$  between the S=1 ground state and the higher energy S=2 state ( $\Delta E = E(S=2) - E(S=1)$ ) of the Fe<sup>IV</sup>=O complexes **1**, **2** and **3**.

| <b>Method</b>                             | <b>1</b> | <b>2</b> | <b>3</b> |
|-------------------------------------------|----------|----------|----------|
| <b>G03/B3LYP/triple-<math>\xi</math></b>  | +4       | +2       | +9       |
| <b>G03/BP86/triple-<math>\xi</math></b>   | +15      | +12      | +22      |
| <b>ADF/B88P86/triple-<math>\xi</math></b> | +13      | +10      | +20      |

all values in kcal/mol, for computational details see methodology section.

**Table SI-3:** Experimental (Abs) and calculated (TD-DFT) intensities of the ligand field transitions of complexes **1**, **2** and **3**.

| <b>d-d transitions</b>                                        | <b>Experimental (Abs)</b> |                                   |                     | <b>Computational (TD-DFT)<sup>a</sup></b> |          |                 |
|---------------------------------------------------------------|---------------------------|-----------------------------------|---------------------|-------------------------------------------|----------|-----------------|
|                                                               | <b>1</b>                  | <b>2</b>                          | <b>3</b>            | <b>1</b>                                  | <b>2</b> | <b>3</b>        |
| <b>I</b> xy $\rightarrow$ x <sup>2</sup> -y <sup>2</sup>      | } ~400 <sup>b</sup>       | } ~250 <sup>c</sup> +<br>shoulder | } ~400 <sup>d</sup> | 0                                         | 0        | 0               |
| <b>II</b> xy $\rightarrow$ xz/yz                              |                           |                                   |                     | 0                                         | 37       | 0               |
| <b>III</b> xz/yz $\rightarrow$ x <sup>2</sup> -y <sup>2</sup> |                           |                                   |                     | 415                                       | 138      | 485             |
| <b>IV</b> xz/yz $\rightarrow$ z <sup>2</sup>                  |                           |                                   |                     | 0                                         | 0        | 64 <sup>e</sup> |
| <b>V</b> xy $\rightarrow$ z <sup>2</sup>                      |                           |                                   |                     | 0                                         | 0        | 92 <sup>e</sup> |

all values in M<sup>-1</sup>cm<sup>-1</sup>; <sup>a</sup> using Gaussian/BP86/triple- $\zeta$ /solv, sum given for transitions into and out of d(xz/yz); <sup>b</sup> ref<sup>1</sup>; <sup>c</sup> ref<sup>2</sup>; <sup>d</sup> ref; <sup>e</sup> intensity from mixed in MLCT and LMCT transitions

**Table SI-4:** Electronic structure parameters for complex **2** (for **1** and **3** given in main text)

|                       | [TMC-OCOCF <sub>3</sub> ]Fe <sup>IV</sup> =O ( <b>3</b> ) |       |        |
|-----------------------|-----------------------------------------------------------|-------|--------|
|                       | Fe                                                        | O     | TMC+ax |
| <b>spin densities</b> | 1.39                                                      | 0.67  | -0.06  |
| <b>charges</b>        | 1.40                                                      | -0.48 | +0.08  |
| <b>α-MO [%]</b>       |                                                           |       |        |
| $z^2$                 | 53                                                        | 22    | 22     |
| $x^2-y^2$             | 59                                                        | 0     | 41     |
| <b>β-MO [%]</b>       |                                                           |       |        |
| $z^2$                 | 56                                                        | 21    | 21     |
| $x^2-y^2$             | 69                                                        | 0     | 31     |
| yz                    | 62                                                        | 32    | 7      |
| xz                    | 58                                                        | 33    | 10     |

from Gaussian/BP86 calculations, MO% given for unoccupied orbitals.

**Table SI-5:** Calculated Fe-O bond lengths, stretching frequencies and Fe-O bond orders of the Fe<sup>IV</sup>=O reactants and Fe<sup>III</sup>-OH products of an H-atom abstraction reaction

|                                 | Fe <sup>IV</sup> =O |          |       | Fe <sup>III</sup> -OH |                  |      |       |      |
|---------------------------------|---------------------|----------|-------|-----------------------|------------------|------|-------|------|
|                                 | <b>1</b>            | <b>3</b> | Δ     | <b>1</b>              | <b>3</b>         | Δ    |       |      |
| <b>r(Fe-O) [Å]</b>              | 1.66                | 1.67     | +0.01 | 1.82                  | 1.82             | 0.00 |       |      |
| <b>v(Fe-O)[cm<sup>-1</sup>]</b> | 846                 | 829      | -17   | 615                   | 647 <sup>a</sup> | +32  |       |      |
| <b>Bond order</b>               |                     |          |       |                       |                  |      |       |      |
| <b>Fe-O σ+π</b>                 | 1.66                | 1.60     | -0.06 | -4%                   | 0.80             | 0.82 | -0.02 | +3%  |
| <b>Fe-O σ</b>                   | 0.83                | 0.72     | -0.11 | -13%                  | 0.53             | 0.50 | -0.03 | -6%  |
| <b>Fe-O π</b>                   | 0.83                | 0.87     | +0.04 | +5%                   | 0.27             | 0.32 | +0.05 | +19% |

all from Gaussian/BP86; <sup>a</sup> weighted average of three modes, Mayer'sche Bond Orders calculated using PyMOLize<sup>3</sup>

**Table SI-6:** Energy difference ΔE between the S=1/2 ground state and the higher energy S=5/2 state (ΔE = E(S=5/2) – E(S=1/2)) of the (N4Py)Fe<sup>III</sup>-OH complex.

|                            | lanl2dz-gas | lanl2dz-solv <sup>b</sup> | 6-311G*-solv <sup>c</sup> |
|----------------------------|-------------|---------------------------|---------------------------|
| B3LYP/lanl2dz <sup>a</sup> | +4.2        | +8.1                      | +3.3                      |
| BP86/lanl2dz <sup>a</sup>  | +25.2       | +29.1                     | +26.7                     |

all values in kcal/mol, calculated with Gaussian, <sup>a</sup> geometry optimized with LanL2DZ in the gasphase, <sup>b</sup> solvent=acetonitrile, <sup>c</sup> single point with triple-ζ basis set 6-311G\*

**Table SI-7:** Bond Order Analysis (Mayer) in Fe(IV)=O reactants and Fe(III)-OH products

|     | (TMC-NCMe)Fe <sup>IV</sup> =O (1) |                    |                    |      | (N4Py)Fe <sup>IV</sup> =O (3) |                    |                    |      |
|-----|-----------------------------------|--------------------|--------------------|------|-------------------------------|--------------------|--------------------|------|
|     | Fe-O                              | Fe-L <sub>eq</sub> | Fe-L <sub>ax</sub> | Σ Fe | Fe-O                          | Fe-L <sub>eq</sub> | Fe-L <sub>ax</sub> | Σ Fe |
| σ+π | 1.66                              | 1.71               | 0.26               | 3.63 | 1.60                          | 2.19               | 0.33               | 4.12 |
| σ   | 0.83                              | 1.57               | 0.18               |      | 0.72                          | 1.99               | 0.27               |      |
| π   | 0.83                              | 0.14               | 0.08               |      | 0.87                          | 0.20               | 0.03               |      |

  

|     | (TMC-NCMe)Fe <sup>III</sup> -OH |                    |                    |      | (N4Py)Fe <sup>III</sup> -OH |      |                    |                    |      |      |
|-----|---------------------------------|--------------------|--------------------|------|-----------------------------|------|--------------------|--------------------|------|------|
|     | Fe-O                            | Fe-L <sub>eq</sub> | Fe-L <sub>ax</sub> | Σ Fe | O-H                         | Fe-O | Fe-L <sub>eq</sub> | Fe-L <sub>ax</sub> | Σ Fe | O-H  |
| σ+π | 0.80                            | 1.57               | 0.33               | 2.70 | 0.78                        | 0.82 | 2.34               | 0.38               | 3.54 | 0.79 |
| σ   | 0.53                            | 1.48               | 0.21               |      |                             | 0.50 | 2.05               | 0.33               |      |      |
| π   | 0.27                            | 0.09               | 0.12               |      |                             | 0.32 | 0.29               | 0.04               |      |      |

Mayer'sche Bond Orders calculated using PyMolize<sup>3</sup>

### References:

- (1) Rohde, J.-U.; In, J.-H.; Lim, M. H.; Brennessel, W. W.; Bukowski, M. R.; Stubna, A.; Munck, E.; Nam, W.; Que, L., Jr. *Science* **2003**, *299*, 1037-1039.
- (2) Rohde, J. U.; Que, L. *Angew. Chem. Int. Ed.* **2005**, *44*, 2255-2258.
- (3) Tenderholt, A. L., PyMOlyze, Version 2.0. Stanford University, Stanford, CA, USA. <http://pymolyze.sourceforge.net>.

### Full Reference 36 for the Gaussian 03 program package:

Gaussian 03, Revision C.02, M. J. Frisch, G. W. Trucks, H. B. Schlegel, G. E. Scuseria, M. A. Robb, J. R. Cheeseman, J. A. Montgomery, Jr., T. Vreven, K. N. Kudin, J. C. Burant, J. M. Millam, S. S. Iyengar, J. Tomasi, V. Barone, B. Mennucci, M. Cossi, G. Scalmani, N. Rega, G. A. Petersson, H. Nakatsuji, M. Hada, M. Ehara, K. Toyota, R. Fukuda, J. Hasegawa, M. Ishida, T. Nakajima, Y. Honda, O. Kitao, H. Nakai, M. Klene, X. Li, J. E. Knox, H. P. Hratchian, J. B. Cross, V. Bakken, C. Adamo, J. Jaramillo, R. Gomperts, R. E. Stratmann, O. Yazyev, A. J. Austin, R. Cammi, C. Pomelli, J. W. Ochterski, P. Y. Ayala, K. Morokuma, G. A. Voth, P. Salvador, J. J. Dannenberg, V. G. Zakrzewski, S. Dapprich, A. D. Daniels, M. C. Strain, O. Farkas, D. K. Malick, A. D. Rabuck, K. Raghavachari, J. B. Foresman, J. V. Ortiz, Q. Cui, A. G. Baboul, S. Clifford, J. Cioslowski, B. B. Stefanov, G. Liu, A. Liashenko, P. Piskorz, I. Komaromi, R. L. Martin, D. J. Fox, T. Keith, M. A. Al-Laham, C. Y. Peng, A. Nanayakkara, M. Challacombe, P. M. W. Gill, B. Johnson, W. Chen, M. W. Wong, C. Gonzalez, and J. A. Pople, Gaussian, Inc., Wallingford CT, 2004.

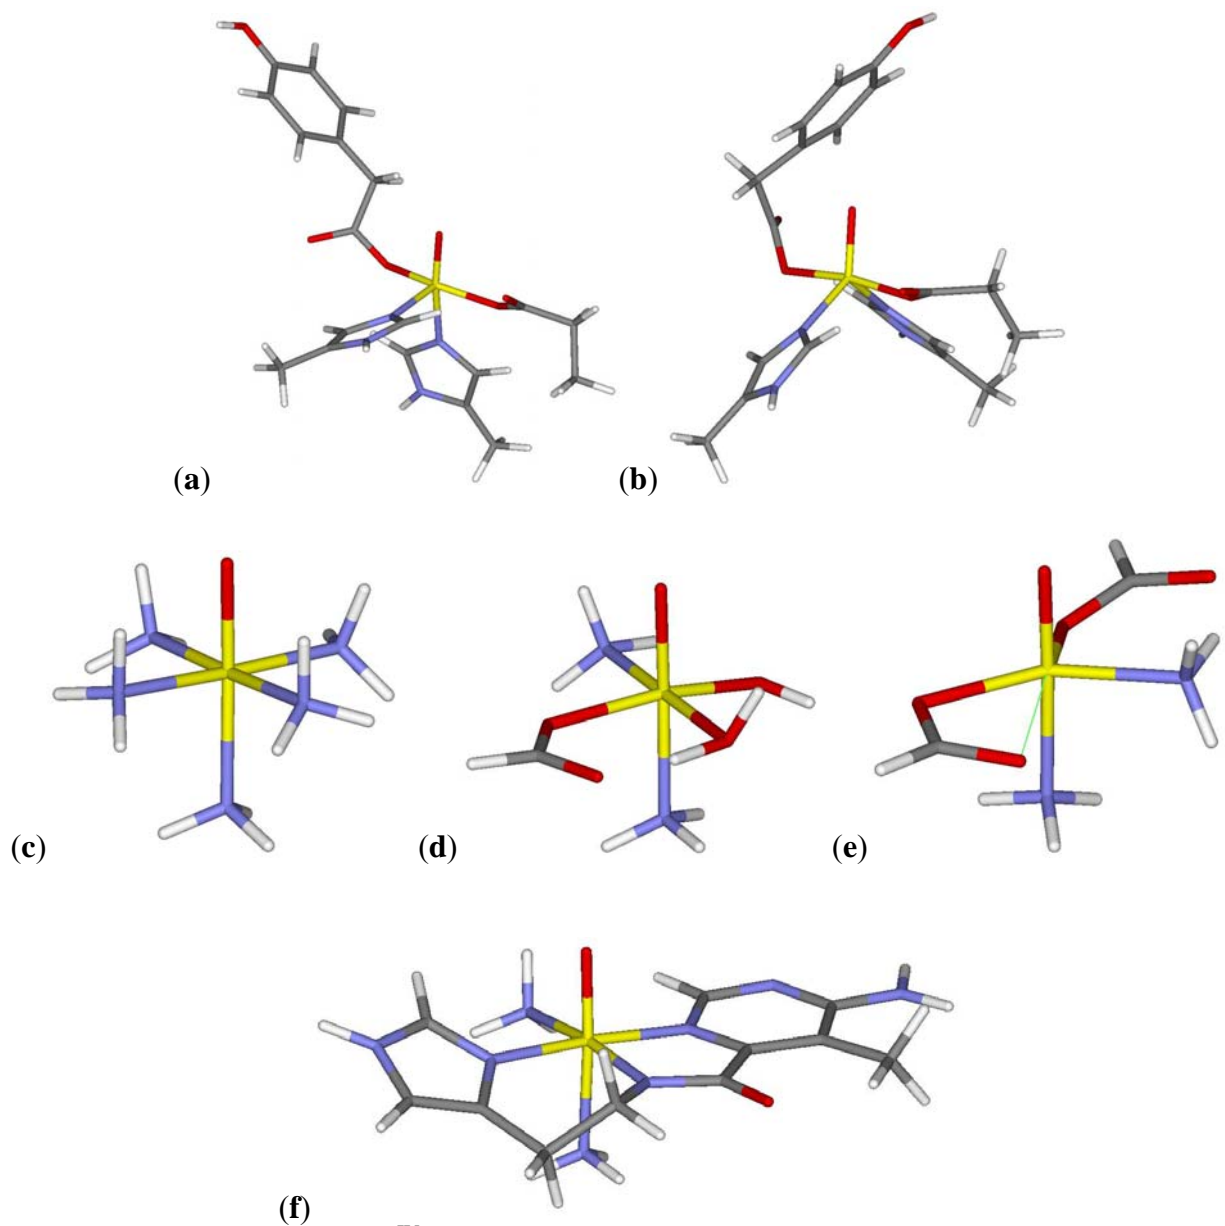

**Figure SI-5:** Structures of  $\text{Fe}^{\text{IV}}=\text{O}$  models, (a) 4-hydroxymandelate synthase (HmaS); (b) 4-hydroxypyruvate dioxygenase (HPPD); (c) non-heme iron model with five ammonias,  $(\text{NH}_3)_5$ ; (d) model of phenylalanine hydroxylase; (e) Taurine: $\alpha$ -KG dioxygenase; (f) bleomycin (BLM)



(TMC-NCMe)Fe(IV)=O S=1  
ADF/B88P86

|    |       |       |       |
|----|-------|-------|-------|
| Fe | -0.02 | 0.00  | -0.20 |
| N  | -1.42 | 1.59  | -0.35 |
| N  | 1.46  | 1.56  | -0.17 |
| N  | 1.46  | -1.56 | -0.17 |
| N  | -1.42 | -1.59 | -0.35 |
| C  | -0.62 | 2.64  | -1.06 |
| C  | 0.71  | 2.86  | -0.39 |
| C  | 2.38  | 1.31  | -1.35 |
| C  | 3.17  | 0.00  | -1.30 |
| C  | 2.38  | -1.31 | -1.35 |
| C  | 0.71  | -2.86 | -0.39 |
| C  | -0.62 | -2.64 | -1.06 |
| C  | -2.60 | -1.27 | -1.22 |
| C  | -3.36 | 0.00  | -0.86 |
| C  | -2.60 | 1.27  | -1.22 |
| C  | -1.92 | 2.13  | 0.95  |
| C  | 2.29  | 1.77  | 1.05  |
| C  | 2.29  | -1.77 | 1.05  |
| C  | -1.93 | -2.12 | 0.95  |
| N  | -0.09 | 0.00  | 1.91  |
| C  | -0.13 | 0.00  | 3.07  |
| C  | -0.19 | 0.00  | 4.52  |
| O  | 0.00  | 0.00  | -1.85 |
| H  | -2.56 | 3.00  | 0.76  |
| H  | -2.51 | 1.36  | 1.47  |
| H  | -1.09 | 2.42  | 1.59  |
| H  | 2.93  | 2.66  | 0.91  |
| H  | 1.65  | 1.94  | 1.91  |
| H  | 2.94  | 0.92  | 1.25  |
| H  | -2.57 | -3.00 | 0.76  |
| H  | -1.10 | -2.42 | 1.60  |
| H  | -2.51 | -1.36 | 1.47  |
| H  | 2.93  | -2.66 | 0.91  |
| H  | 2.94  | -0.92 | 1.25  |
| H  | 1.64  | -1.94 | 1.92  |
| H  | -0.77 | -0.86 | 4.88  |
| H  | 0.83  | -0.06 | 4.94  |
| H  | -0.66 | 0.92  | 4.88  |
| H  | -2.22 | -1.17 | -2.25 |
| H  | -3.28 | -2.14 | -1.19 |
| H  | -4.28 | 0.00  | -1.46 |
| H  | -3.70 | 0.00  | 0.19  |
| H  | -3.28 | 2.14  | -1.19 |
| H  | -2.22 | 1.18  | -2.25 |
| H  | -1.19 | 3.59  | -1.09 |
| H  | -0.48 | 2.29  | -2.09 |
| H  | 1.33  | 3.54  | -0.98 |
| H  | 0.57  | 3.32  | 0.59  |
| H  | 1.77  | 1.35  | -2.25 |
| H  | 3.10  | 2.15  | -1.38 |
| H  | 3.81  | 0.00  | -2.20 |
| H  | 3.88  | 0.00  | -0.46 |
| H  | 3.10  | -2.15 | -1.38 |
| H  | 1.77  | -1.35 | -2.25 |
| H  | 1.33  | -3.55 | -0.98 |
| H  | 0.57  | -3.32 | 0.60  |
| H  | -1.19 | -3.59 | -1.09 |
| H  | -0.49 | -2.30 | -2.09 |

TMC-NCMe)Fe(IV)=O S=2  
ADF/B88P86

|    |       |       |       |
|----|-------|-------|-------|
| Fe | -0.05 | 0.00  | -0.18 |
| N  | -1.46 | 1.69  | -0.36 |
| N  | 1.52  | 1.63  | -0.15 |
| N  | 1.52  | -1.63 | -0.15 |
| N  | -1.45 | -1.69 | -0.37 |
| C  | -0.60 | 2.69  | -1.09 |
| C  | 0.75  | 2.90  | -0.41 |
| C  | 2.44  | 1.33  | -1.31 |
| C  | 3.21  | 0.00  | -1.22 |
| C  | 2.44  | -1.32 | -1.31 |
| C  | 0.75  | -2.90 | -0.41 |
| C  | -0.60 | -2.69 | -1.09 |
| C  | -2.61 | -1.29 | -1.25 |
| C  | -3.33 | 0.00  | -0.85 |
| C  | -2.61 | 1.30  | -1.25 |
| C  | -1.98 | 2.28  | 0.90  |
| C  | 2.32  | 1.85  | 1.08  |
| C  | 2.33  | -1.85 | 1.08  |
| C  | -1.98 | -2.28 | 0.90  |
| N  | -0.15 | 0.00  | 1.90  |
| C  | -0.21 | 0.00  | 3.06  |
| C  | -0.28 | 0.00  | 4.50  |
| O  | 0.00  | 0.00  | -1.83 |
| H  | -2.59 | 3.17  | 0.68  |
| H  | -2.60 | 1.55  | 1.42  |
| H  | -1.15 | 2.56  | 1.56  |
| H  | 3.00  | 2.71  | 0.95  |
| H  | 1.66  | 2.05  | 1.93  |
| H  | 2.93  | 0.97  | 1.32  |
| H  | -2.59 | -3.17 | 0.68  |
| H  | -1.15 | -2.57 | 1.56  |
| H  | -2.60 | -1.55 | 1.42  |
| H  | 3.00  | -2.71 | 0.95  |
| H  | 2.93  | -0.98 | 1.32  |
| H  | 1.66  | -2.06 | 1.93  |
| H  | -0.74 | -0.93 | 4.86  |
| H  | 0.73  | 0.07  | 4.93  |
| H  | -0.88 | 0.85  | 4.85  |
| H  | -2.22 | -1.19 | -2.27 |
| H  | -3.33 | -2.13 | -1.25 |
| H  | -4.28 | 0.00  | -1.40 |
| H  | -3.62 | 0.00  | 0.21  |
| H  | -3.33 | 2.13  | -1.24 |
| H  | -2.22 | 1.19  | -2.26 |
| H  | -1.12 | 3.66  | -1.15 |
| H  | -0.46 | 2.31  | -2.11 |
| H  | 1.35  | 3.58  | -1.02 |
| H  | 0.60  | 3.39  | 0.56  |
| H  | 1.83  | 1.34  | -2.22 |
| H  | 3.18  | 2.15  | -1.37 |
| H  | 3.89  | 0.00  | -2.09 |
| H  | 3.89  | 0.00  | -0.35 |
| H  | 3.17  | -2.15 | -1.37 |
| H  | 1.83  | -1.34 | -2.22 |
| H  | 1.35  | -3.58 | -1.02 |
| H  | 0.60  | -3.39 | 0.56  |
| H  | -1.12 | -3.65 | -1.16 |
| H  | -0.46 | -2.31 | -2.11 |

(TMC-NCMe)Fe(IV)=O S=1  
excited state; ADF/B88P86

|    |       |       |       |
|----|-------|-------|-------|
| Fe | -0.03 | 0.00  | -0.17 |
| N  | -1.44 | 1.64  | -0.35 |
| N  | 1.49  | 1.58  | -0.16 |
| N  | 1.49  | -1.58 | -0.16 |
| N  | -1.45 | -1.64 | -0.35 |
| C  | -0.61 | 2.65  | -1.07 |
| C  | 0.72  | 2.86  | -0.38 |
| C  | 2.38  | 1.31  | -1.35 |
| C  | 3.17  | 0.00  | -1.30 |
| C  | 2.38  | -1.31 | -1.35 |
| C  | 0.72  | -2.86 | -0.38 |
| C  | -0.61 | -2.65 | -1.07 |
| C  | -2.61 | -1.28 | -1.23 |
| C  | -3.35 | 0.00  | -0.86 |
| C  | -2.61 | 1.28  | -1.23 |
| C  | -1.96 | 2.19  | 0.94  |
| C  | 2.33  | 1.79  | 1.05  |
| C  | 2.33  | -1.80 | 1.05  |
| C  | -1.96 | -2.19 | 0.94  |
| N  | -0.09 | 0.00  | 1.89  |
| C  | -0.14 | 0.00  | 3.06  |
| C  | -0.19 | 0.00  | 4.51  |
| O  | -0.06 | 0.00  | -1.87 |
| H  | -2.58 | 3.07  | 0.74  |
| H  | -2.56 | 1.44  | 1.45  |
| H  | -1.13 | 2.48  | 1.59  |
| H  | 2.97  | 2.68  | 0.90  |
| H  | 1.69  | 1.97  | 1.92  |
| H  | 2.97  | 0.94  | 1.25  |
| H  | -2.58 | -3.07 | 0.74  |
| H  | -1.13 | -2.48 | 1.59  |
| H  | -2.56 | -1.44 | 1.45  |
| H  | 2.97  | -2.68 | 0.90  |
| H  | 2.97  | -0.94 | 1.25  |
| H  | 1.69  | -1.97 | 1.92  |
| H  | -0.76 | -0.86 | 4.87  |
| H  | 0.83  | -0.06 | 4.92  |
| H  | -0.66 | 0.92  | 4.87  |
| H  | -2.21 | -1.18 | -2.25 |
| H  | -3.30 | -2.13 | -1.22 |
| H  | -4.28 | 0.00  | -1.45 |
| H  | -3.68 | 0.00  | 0.19  |
| H  | -3.30 | 2.14  | -1.22 |
| H  | -2.21 | 1.18  | -2.25 |
| H  | -1.15 | 3.61  | -1.12 |
| H  | -0.46 | 2.28  | -2.09 |
| H  | 1.34  | 3.56  | -0.97 |
| H  | 0.58  | 3.32  | 0.60  |
| H  | 1.74  | 1.32  | -2.24 |
| H  | 3.10  | 2.15  | -1.42 |
| H  | 3.81  | 0.00  | -2.21 |
| H  | 3.89  | 0.00  | -0.47 |
| H  | 3.10  | -2.15 | -1.42 |
| H  | 1.74  | -1.33 | -2.24 |
| H  | 1.34  | -3.56 | -0.97 |
| H  | 0.58  | -3.32 | 0.61  |
| H  | -1.15 | -3.61 | -1.12 |
| H  | -0.46 | -2.28 | -2.09 |

(TMC-NCMe)Fe(IV)=O S=1  
Gaussian/B3LYP

|    |       |       |       |
|----|-------|-------|-------|
| Fe | 0.02  | 0.00  | -0.22 |
| N  | 1.42  | -1.58 | -0.35 |
| N  | -1.46 | -1.56 | -0.18 |
| N  | -1.46 | 1.56  | -0.18 |
| N  | 1.42  | 1.58  | -0.35 |
| C  | 0.63  | -2.65 | -1.08 |
| C  | -0.71 | -2.87 | -0.40 |
| C  | -2.40 | -1.31 | -1.36 |
| C  | -3.20 | 0.00  | -1.31 |
| C  | -2.40 | 1.31  | -1.36 |
| C  | -0.71 | 2.87  | -0.40 |
| C  | 0.63  | 2.65  | -1.08 |
| C  | 2.63  | 1.27  | -1.22 |
| C  | 3.40  | 0.00  | -0.84 |
| C  | 2.63  | -1.27 | -1.22 |
| C  | 1.92  | -2.11 | 0.97  |
| C  | -2.29 | -1.77 | 1.06  |
| C  | -2.29 | 1.77  | 1.06  |
| C  | 1.92  | 2.11  | 0.97  |
| N  | 0.09  | 0.00  | 1.94  |
| C  | 0.11  | 0.00  | 3.11  |
| C  | 0.15  | 0.00  | 4.57  |
| O  | 0.01  | 0.00  | -1.86 |
| H  | 2.56  | -2.99 | 0.80  |
| H  | 2.49  | -1.35 | 1.49  |
| H  | 1.08  | -2.41 | 1.61  |
| H  | -2.93 | -2.65 | 0.93  |
| H  | -1.64 | -1.94 | 1.92  |
| H  | -2.93 | -0.92 | 1.27  |
| H  | 2.56  | 2.99  | 0.80  |
| H  | 1.08  | 2.41  | 1.61  |
| H  | 2.49  | 1.35  | 1.49  |
| H  | -2.93 | 2.65  | 0.93  |
| H  | -2.93 | 0.92  | 1.27  |
| H  | -1.64 | 1.94  | 1.92  |
| H  | 0.67  | 0.89  | 4.94  |
| H  | -0.87 | 0.00  | 4.98  |
| H  | 0.67  | -0.89 | 4.94  |
| H  | 2.27  | 1.17  | -2.25 |
| H  | 3.30  | 2.14  | -1.18 |
| H  | 4.33  | 0.00  | -1.42 |
| H  | 3.71  | 0.00  | 0.21  |
| H  | 3.30  | -2.14 | -1.18 |
| H  | 2.27  | -1.17 | -2.25 |
| H  | 1.20  | -3.59 | -1.09 |
| H  | 0.50  | -2.32 | -2.11 |
| H  | -1.33 | -3.55 | -1.01 |
| H  | -0.58 | -3.35 | 0.57  |
| H  | -1.79 | -1.35 | -2.27 |
| H  | -3.11 | -2.15 | -1.39 |
| H  | -3.83 | 0.00  | -2.20 |
| H  | -3.89 | 0.00  | -0.46 |
| H  | -3.11 | 2.15  | -1.39 |
| H  | -1.79 | 1.35  | -2.27 |
| H  | -1.33 | 3.55  | -1.01 |
| H  | -0.58 | 3.35  | 0.57  |
| H  | 1.20  | 3.59  | -1.09 |
| H  | 0.50  | 2.32  | -2.11 |

(TMC-NCMe)Fe(IV)=O S=1  
Gaussian/BP86

|    |       |       |       |
|----|-------|-------|-------|
| Fe | -0.02 | 0.00  | -0.21 |
| N  | -1.42 | 1.58  | -0.35 |
| N  | 1.46  | 1.56  | -0.17 |
| N  | 1.46  | -1.56 | -0.17 |
| N  | -1.42 | -1.58 | -0.35 |
| C  | -0.62 | 2.66  | -1.08 |
| C  | 0.71  | 2.88  | -0.39 |
| C  | 2.40  | 1.31  | -1.36 |
| C  | 3.20  | 0.00  | -1.31 |
| C  | 2.40  | -1.32 | -1.36 |
| C  | 0.71  | -2.88 | -0.38 |
| C  | -0.62 | -2.66 | -1.08 |
| C  | -2.63 | -1.27 | -1.24 |
| C  | -3.40 | 0.00  | -0.86 |
| C  | -2.63 | 1.27  | -1.24 |
| C  | -1.92 | 2.11  | 0.97  |
| C  | 2.30  | 1.77  | 1.08  |
| C  | 2.30  | -1.77 | 1.08  |
| C  | -1.93 | -2.11 | 0.97  |
| N  | -0.09 | 0.00  | 1.92  |
| C  | -0.13 | 0.00  | 3.10  |
| C  | -0.19 | 0.00  | 4.56  |
| O  | 0.00  | 0.00  | -1.86 |
| H  | -2.57 | 2.99  | 0.80  |
| H  | -2.51 | 1.34  | 1.49  |
| H  | -1.09 | 2.41  | 1.61  |
| H  | 2.94  | 2.66  | 0.94  |
| H  | 1.65  | 1.93  | 1.94  |
| H  | 2.95  | 0.91  | 1.27  |
| H  | -2.58 | -2.99 | 0.80  |
| H  | -1.09 | -2.41 | 1.62  |
| H  | -2.51 | -1.34 | 1.49  |
| H  | 2.94  | -2.66 | 0.94  |
| H  | 2.95  | -0.91 | 1.27  |
| H  | 1.65  | -1.93 | 1.95  |
| H  | -0.77 | -0.86 | 4.93  |
| H  | 0.83  | -0.06 | 4.99  |
| H  | -0.67 | 0.93  | 4.93  |
| H  | -2.25 | -1.17 | -2.27 |
| H  | -3.30 | -2.15 | -1.20 |
| H  | -4.34 | 0.00  | -1.45 |
| H  | -3.73 | 0.00  | 0.20  |
| H  | -3.30 | 2.15  | -1.20 |
| H  | -2.25 | 1.17  | -2.27 |
| H  | -1.20 | 3.60  | -1.11 |
| H  | -0.47 | 2.31  | -2.12 |
| H  | 1.34  | 3.57  | -0.98 |
| H  | 0.57  | 3.35  | 0.60  |
| H  | 1.78  | 1.34  | -2.27 |
| H  | 3.11  | 2.16  | -1.40 |
| H  | 3.84  | 0.00  | -2.21 |
| H  | 3.91  | 0.00  | -0.46 |
| H  | 3.11  | -2.17 | -1.40 |
| H  | 1.78  | -1.34 | -2.27 |
| H  | 1.34  | -3.57 | -0.98 |
| H  | 0.56  | -3.35 | 0.60  |
| H  | -1.20 | -3.60 | -1.11 |
| H  | -0.48 | -2.31 | -2.12 |

(TMC-NCMe)Fe(IV)=O S=2  
Gaussian/B3LYP

|    |       |       |       |
|----|-------|-------|-------|
| Fe | -0.03 | 0.00  | -0.20 |
| N  | -1.46 | 1.68  | -0.38 |
| N  | 1.51  | 1.63  | -0.14 |
| N  | 1.52  | -1.62 | -0.15 |
| N  | -1.45 | -1.68 | -0.39 |
| C  | -0.60 | 2.70  | -1.11 |
| C  | 0.74  | 2.92  | -0.41 |
| C  | 2.47  | 1.34  | -1.29 |
| C  | 3.25  | 0.01  | -1.19 |
| C  | 2.48  | -1.32 | -1.30 |
| C  | 0.76  | -2.91 | -0.42 |
| C  | -0.59 | -2.69 | -1.12 |
| C  | -2.62 | -1.30 | -1.28 |
| C  | -3.35 | -0.01 | -0.88 |
| C  | -2.63 | 1.29  | -1.27 |
| C  | -1.98 | 2.25  | 0.91  |
| C  | 2.30  | 1.84  | 1.13  |
| C  | 2.31  | -1.84 | 1.12  |
| C  | -1.97 | -2.26 | 0.89  |
| N  | -0.17 | -0.01 | 1.92  |
| C  | -0.24 | -0.01 | 3.09  |
| C  | -0.33 | -0.02 | 4.55  |
| O  | 0.02  | 0.01  | -1.84 |
| H  | -2.59 | 3.14  | 0.71  |
| H  | -2.60 | 1.51  | 1.42  |
| H  | -1.16 | 2.53  | 1.57  |
| H  | 2.97  | 2.70  | 1.02  |
| H  | 1.62  | 2.04  | 1.96  |
| H  | 2.90  | 0.97  | 1.37  |
| H  | -2.58 | -3.15 | 0.68  |
| H  | -1.15 | -2.55 | 1.55  |
| H  | -2.59 | -1.53 | 1.41  |
| H  | 2.99  | -2.69 | 1.00  |
| H  | 2.91  | -0.96 | 1.37  |
| H  | 1.63  | -2.05 | 1.95  |
| H  | -0.92 | -0.88 | 4.89  |
| H  | 0.67  | -0.08 | 5.00  |
| H  | -0.82 | 0.90  | 4.91  |
| H  | -2.23 | -1.18 | -2.30 |
| H  | -3.32 | -2.14 | -1.28 |
| H  | -4.30 | -0.01 | -1.43 |
| H  | -3.63 | -0.01 | 0.18  |
| H  | -3.34 | 2.13  | -1.27 |
| H  | -2.24 | 1.19  | -2.29 |
| H  | -1.13 | 3.66  | -1.16 |
| H  | -0.45 | 2.34  | -2.13 |
| H  | 1.36  | 3.59  | -1.02 |
| H  | 0.59  | 3.42  | 0.55  |
| H  | 1.88  | 1.35  | -2.21 |
| H  | 3.20  | 2.16  | -1.33 |
| H  | 3.94  | 0.02  | -2.05 |
| H  | 3.91  | 0.01  | -0.31 |
| H  | 3.21  | -2.14 | -1.35 |
| H  | 1.89  | -1.33 | -2.22 |
| H  | 1.38  | -3.58 | -1.04 |
| H  | 0.61  | -3.42 | 0.53  |
| H  | -1.11 | -3.66 | -1.19 |
| H  | -0.44 | -2.32 | -2.14 |

(TMC-NCMe)Fe(IV)=O S=2  
Gaussian/BP86

|    |       |       |       |
|----|-------|-------|-------|
| Fe | -0.05 | 0.00  | -0.19 |
| N  | -1.46 | 1.69  | -0.37 |
| N  | 1.52  | 1.63  | -0.15 |
| N  | 1.52  | -1.63 | -0.15 |
| N  | -1.46 | -1.69 | -0.37 |
| C  | -0.60 | 2.70  | -1.11 |
| C  | 0.75  | 2.92  | -0.41 |
| C  | 2.46  | 1.33  | -1.32 |
| C  | 3.24  | 0.00  | -1.23 |
| C  | 2.46  | -1.33 | -1.33 |
| C  | 0.75  | -2.92 | -0.41 |
| C  | -0.60 | -2.70 | -1.11 |
| C  | -2.64 | -1.30 | -1.26 |
| C  | -3.37 | 0.00  | -0.86 |
| C  | -2.64 | 1.30  | -1.26 |
| C  | -1.98 | 2.27  | 0.92  |
| C  | 2.33  | 1.84  | 1.11  |
| C  | 2.33  | -1.84 | 1.11  |
| C  | -1.98 | -2.27 | 0.92  |
| N  | -0.15 | 0.00  | 1.90  |
| C  | -0.21 | 0.00  | 3.08  |
| C  | -0.28 | 0.00  | 4.54  |
| O  | 0.00  | 0.00  | -1.84 |
| H  | -2.59 | 3.17  | 0.72  |
| H  | -2.60 | 1.52  | 1.44  |
| H  | -1.15 | 2.55  | 1.58  |
| H  | 3.01  | 2.71  | 0.99  |
| H  | 1.66  | 2.04  | 1.96  |
| H  | 2.94  | 0.96  | 1.34  |
| H  | -2.59 | -3.17 | 0.72  |
| H  | -1.15 | -2.55 | 1.58  |
| H  | -2.60 | -1.53 | 1.44  |
| H  | 3.01  | -2.71 | 0.98  |
| H  | 2.94  | -0.96 | 1.34  |
| H  | 1.66  | -2.05 | 1.96  |
| H  | -0.75 | -0.93 | 4.91  |
| H  | 0.73  | 0.07  | 4.98  |
| H  | -0.88 | 0.85  | 4.90  |
| H  | -2.25 | -1.19 | -2.29 |
| H  | -3.35 | -2.14 | -1.26 |
| H  | -4.33 | 0.00  | -1.39 |
| H  | -3.64 | 0.00  | 0.22  |
| H  | -3.35 | 2.15  | -1.26 |
| H  | -2.25 | 1.19  | -2.29 |
| H  | -1.13 | 3.67  | -1.18 |
| H  | -0.45 | 2.32  | -2.13 |
| H  | 1.37  | 3.61  | -1.02 |
| H  | 0.59  | 3.42  | 0.57  |
| H  | 1.84  | 1.34  | -2.24 |
| H  | 3.19  | 2.16  | -1.39 |
| H  | 3.93  | 0.00  | -2.10 |
| H  | 3.91  | 0.00  | -0.35 |
| H  | 3.19  | -2.16 | -1.39 |
| H  | 1.84  | -1.33 | -2.24 |
| H  | 1.37  | -3.61 | -1.02 |
| H  | 0.59  | -3.42 | 0.56  |
| H  | -1.13 | -3.67 | -1.18 |
| H  | -0.45 | -2.32 | -2.14 |

(TMC-NCMe)Fe(III)-OH S=1/2  
ADF/B88P86

|    |       |       |       |
|----|-------|-------|-------|
| Fe | -0.03 | 0.01  | -0.16 |
| N  | -1.40 | -1.60 | -0.37 |
| N  | 1.47  | -1.54 | -0.22 |
| N  | 1.42  | 1.59  | -0.12 |
| N  | -1.43 | 1.60  | -0.25 |
| C  | -0.60 | -2.62 | -1.14 |
| C  | 0.74  | -2.84 | -0.49 |
| C  | 2.40  | -1.23 | -1.38 |
| C  | 3.17  | 0.08  | -1.27 |
| C  | 2.38  | 1.40  | -1.27 |
| C  | 0.68  | 2.90  | -0.28 |
| C  | -0.69 | 2.72  | -0.91 |
| C  | -2.64 | 1.29  | -1.11 |
| C  | -3.36 | -0.01 | -0.78 |
| C  | -2.60 | -1.25 | -1.21 |
| C  | -1.88 | -2.20 | 0.91  |
| C  | 2.31  | -1.80 | 0.99  |
| C  | 2.24  | 1.76  | 1.12  |
| C  | -1.93 | 2.06  | 1.08  |
| H  | -0.49 | -2.23 | -2.16 |
| H  | -1.16 | -3.57 | -1.18 |
| H  | 1.36  | -3.49 | -1.12 |
| H  | 0.62  | -3.35 | 0.47  |
| H  | 1.79  | -1.24 | -2.29 |
| H  | 3.13  | -2.06 | -1.44 |
| H  | 3.82  | 0.12  | -2.15 |
| H  | 3.86  | 0.06  | -0.42 |
| H  | 1.82  | 1.49  | -2.21 |
| H  | 3.10  | 2.23  | -1.25 |
| H  | 0.57  | 3.35  | 0.71  |
| H  | 1.28  | 3.60  | -0.88 |
| H  | -0.62 | 2.50  | -1.98 |
| H  | -1.26 | 3.65  | -0.83 |
| H  | -3.33 | 2.15  | -1.01 |
| H  | -2.30 | 1.25  | -2.15 |
| H  | -4.30 | 0.00  | -1.35 |
| H  | -3.67 | -0.05 | 0.28  |
| H  | -2.24 | -1.12 | -2.24 |
| H  | -3.27 | -2.13 | -1.20 |
| H  | -2.48 | -1.47 | 1.47  |
| H  | -2.52 | -3.08 | 0.69  |
| H  | -1.04 | -2.52 | 1.53  |
| H  | 2.96  | -2.66 | 0.80  |
| H  | 1.67  | -2.03 | 1.84  |
| H  | 2.94  | -0.94 | 1.23  |
| H  | 2.86  | 0.88  | 1.32  |
| H  | 1.58  | 1.93  | 1.98  |
| H  | 2.90  | 2.63  | 1.01  |
| H  | -1.09 | 2.36  | 1.72  |
| H  | -2.48 | 1.26  | 1.58  |
| H  | -2.60 | 2.93  | 0.94  |
| N  | -0.07 | -0.08 | 1.81  |
| C  | -0.09 | -0.14 | 2.98  |
| C  | -0.12 | -0.20 | 4.43  |
| H  | -0.67 | -1.09 | 4.76  |
| H  | 0.91  | -0.27 | 4.82  |
| H  | -0.59 | 0.69  | 4.84  |
| O  | -0.05 | -0.03 | -1.97 |
| H  | -0.05 | 0.85  | -2.40 |

(TMC-NCMe)Fe(III)-OH S=1/2  
Gaussian/BP86

|    |       |       |       |
|----|-------|-------|-------|
| Fe | -0.02 | 0.01  | -0.17 |
| N  | -1.40 | -1.59 | -0.37 |
| N  | 1.47  | -1.54 | -0.22 |
| N  | 1.42  | 1.59  | -0.12 |
| N  | -1.44 | 1.59  | -0.26 |
| C  | -0.60 | -2.63 | -1.15 |
| C  | 0.74  | -2.86 | -0.49 |
| C  | 2.41  | -1.23 | -1.39 |
| C  | 3.20  | 0.09  | -1.28 |
| C  | 2.40  | 1.40  | -1.29 |
| C  | 0.68  | 2.93  | -0.28 |
| C  | -0.69 | 2.74  | -0.92 |
| C  | -2.66 | 1.29  | -1.13 |
| C  | -3.40 | -0.01 | -0.78 |
| C  | -2.62 | -1.25 | -1.22 |
| C  | -1.89 | -2.19 | 0.93  |
| C  | 2.32  | -1.80 | 1.02  |
| C  | 2.25  | 1.75  | 1.15  |
| C  | -1.93 | 2.05  | 1.10  |
| H  | -0.47 | -2.23 | -2.17 |
| H  | -1.17 | -3.58 | -1.21 |
| H  | 1.37  | -3.51 | -1.13 |
| H  | 0.62  | -3.39 | 0.48  |
| H  | 1.78  | -1.23 | -2.30 |
| H  | 3.13  | -2.07 | -1.47 |
| H  | 3.86  | 0.12  | -2.17 |
| H  | 3.89  | 0.06  | -0.42 |
| H  | 1.83  | 1.50  | -2.23 |
| H  | 3.12  | 2.25  | -1.26 |
| H  | 0.57  | 3.38  | 0.72  |
| H  | 1.29  | 3.62  | -0.88 |
| H  | -0.61 | 2.53  | -2.01 |
| H  | -1.28 | 3.68  | -0.83 |
| H  | -3.35 | 2.16  | -1.03 |
| H  | -2.33 | 1.25  | -2.18 |
| H  | -4.35 | 0.00  | -1.35 |
| H  | -3.70 | -0.05 | 0.28  |
| H  | -2.26 | -1.11 | -2.25 |
| H  | -3.29 | -2.14 | -1.21 |
| H  | -2.48 | -1.46 | 1.50  |
| H  | -2.53 | -3.07 | 0.72  |
| H  | -1.04 | -2.52 | 1.55  |
| H  | 2.98  | -2.67 | 0.83  |
| H  | 1.67  | -2.03 | 1.88  |
| H  | 2.96  | -0.94 | 1.26  |
| H  | 2.87  | 0.87  | 1.34  |
| H  | 1.58  | 1.92  | 2.01  |
| H  | 2.92  | 2.63  | 1.05  |
| H  | -1.08 | 2.34  | 1.74  |
| H  | -2.48 | 1.24  | 1.59  |
| H  | -2.61 | 2.92  | 0.98  |
| N  | -0.06 | -0.08 | 1.81  |
| C  | -0.09 | -0.14 | 3.00  |
| C  | -0.11 | -0.21 | 4.46  |
| H  | -0.67 | -1.10 | 4.80  |
| H  | 0.91  | -0.28 | 4.86  |
| H  | -0.59 | 0.69  | 4.89  |
| O  | -0.05 | -0.05 | -1.99 |
| H  | -0.03 | 0.82  | -2.47 |

**(TMC-NCMe)Fe(III)-OH S=1/2**  
Gaussian/B3LYP

**(TMC-NMCE)Fe(III)-OH S=5/2**  
Gaussian/B3LYP

|    |       |       |       |
|----|-------|-------|-------|
| Fe | -0.01 | 0.00  | -0.17 |
| N  | -1.42 | -1.56 | -0.37 |
| N  | 1.46  | -1.55 | -0.14 |
| N  | 1.48  | 1.54  | -0.11 |
| N  | -1.40 | 1.59  | -0.35 |
| C  | -0.61 | -2.63 | -1.09 |
| C  | 0.71  | -2.86 | -0.38 |
| C  | 2.44  | -1.32 | -1.29 |
| C  | 3.24  | -0.01 | -1.22 |
| C  | 2.48  | 1.32  | -1.25 |
| C  | 0.75  | 2.86  | -0.34 |
| C  | -0.58 | 2.65  | -1.06 |
| C  | -2.58 | 1.29  | -1.26 |
| C  | -3.37 | 0.03  | -0.90 |
| C  | -2.60 | -1.24 | -1.27 |
| C  | -1.96 | -2.11 | 0.93  |
| C  | 2.26  | -1.78 | 1.13  |
| C  | 2.27  | 1.74  | 1.17  |
| C  | -1.92 | 2.13  | 0.96  |
| H  | -0.45 | -2.27 | -2.10 |
| H  | -1.19 | -3.56 | -1.13 |
| H  | 1.34  | -3.54 | -0.97 |
| H  | 0.55  | -3.34 | 0.59  |
| H  | 1.87  | -1.40 | -2.22 |
| H  | 3.16  | -2.16 | -1.28 |
| H  | 3.90  | -0.01 | -2.10 |
| H  | 3.93  | -0.03 | -0.36 |
| H  | 1.94  | 1.46  | -2.19 |
| H  | 3.22  | 2.14  | -1.20 |
| H  | 0.59  | 3.33  | 0.64  |
| H  | 1.38  | 3.54  | -0.92 |
| H  | -0.42 | 2.30  | -2.08 |
| H  | -1.14 | 3.59  | -1.09 |
| H  | -3.24 | 2.17  | -1.23 |
| H  | -2.19 | 1.18  | -2.27 |
| H  | -4.29 | 0.04  | -1.51 |
| H  | -3.71 | 0.02  | 0.14  |
| H  | -2.20 | -1.12 | -2.28 |
| H  | -3.27 | -2.11 | -1.26 |
| H  | -2.54 | -1.35 | 1.44  |
| H  | -2.60 | -2.97 | 0.73  |
| H  | -1.14 | -2.43 | 1.59  |
| H  | 2.88  | -2.68 | 1.01  |
| H  | 1.58  | -1.93 | 1.97  |
| H  | 2.92  | -0.95 | 1.35  |
| H  | 2.92  | 0.89  | 1.38  |
| H  | 1.59  | 1.88  | 2.01  |
| H  | 2.90  | 2.63  | 1.07  |
| H  | -1.11 | 2.42  | 1.62  |
| H  | -2.53 | 1.37  | 1.46  |
| H  | -2.55 | 3.00  | 0.77  |
| N  | -0.14 | -0.01 | 1.91  |
| C  | -0.23 | -0.03 | 3.08  |
| C  | -0.34 | -0.04 | 4.54  |
| H  | -0.94 | -0.90 | 4.86  |
| H  | 0.65  | -0.11 | 5.00  |
| H  | -0.83 | 0.87  | 4.89  |
| O  | -0.11 | -0.02 | -2.06 |
| H  | 0.69  | 0.15  | -2.59 |

|    |       |       |       |
|----|-------|-------|-------|
| Fe | 0.02  | 0.00  | -0.30 |
| N  | 1.45  | 1.69  | -0.37 |
| N  | -1.51 | 1.64  | -0.11 |
| N  | -1.51 | -1.64 | -0.12 |
| N  | 1.45  | -1.69 | -0.37 |
| C  | 0.60  | 2.72  | -1.10 |
| C  | -0.76 | 2.93  | -0.42 |
| C  | -2.54 | 1.34  | -1.20 |
| C  | -3.30 | 0.00  | -1.05 |
| C  | -2.54 | -1.33 | -1.21 |
| C  | -0.76 | -2.93 | -0.44 |
| C  | 0.61  | -2.71 | -1.11 |
| C  | 2.65  | -1.30 | -1.23 |
| C  | 3.36  | 0.00  | -0.82 |
| C  | 2.64  | 1.31  | -1.23 |
| C  | 1.94  | 2.26  | 0.93  |
| C  | -2.23 | 1.85  | 1.20  |
| C  | -2.23 | -1.86 | 1.19  |
| C  | 1.95  | -2.26 | 0.92  |
| H  | 0.47  | 2.36  | -2.12 |
| H  | 1.13  | 3.68  | -1.14 |
| H  | -1.38 | 3.57  | -1.07 |
| H  | -0.62 | 3.47  | 0.52  |
| H  | -2.01 | 1.36  | -2.15 |
| H  | -3.28 | 2.15  | -1.20 |
| H  | -4.05 | 0.00  | -1.87 |
| H  | -3.90 | 0.00  | -0.13 |
| H  | -2.01 | -1.36 | -2.16 |
| H  | -3.28 | -2.15 | -1.21 |
| H  | -0.62 | -3.47 | 0.50  |
| H  | -1.37 | -3.57 | -1.08 |
| H  | 0.48  | -2.35 | -2.13 |
| H  | 1.13  | -3.67 | -1.16 |
| H  | 3.37  | -2.13 | -1.20 |
| H  | 2.29  | -1.21 | -2.26 |
| H  | 4.32  | 0.01  | -1.34 |
| H  | 3.61  | 0.00  | 0.25  |
| H  | 2.29  | 1.22  | -2.26 |
| H  | 3.36  | 2.14  | -1.19 |
| H  | 2.56  | 1.53  | 1.45  |
| H  | 2.55  | 3.16  | 0.75  |
| H  | 1.10  | 2.53  | 1.58  |
| H  | -2.93 | 2.70  | 1.11  |
| H  | -1.51 | 2.08  | 1.99  |
| H  | -2.80 | 0.97  | 1.49  |
| H  | -2.80 | -0.98 | 1.48  |
| H  | -1.51 | -2.09 | 1.98  |
| H  | -2.93 | -2.71 | 1.10  |
| H  | 1.11  | -2.54 | 1.57  |
| H  | 2.56  | -1.53 | 1.45  |
| H  | 2.55  | -3.16 | 0.73  |
| N  | 0.19  | -0.01 | 2.00  |
| C  | 0.27  | -0.01 | 3.17  |
| C  | 0.37  | -0.01 | 4.63  |
| H  | 0.82  | 0.92  | 4.98  |
| H  | -0.62 | -0.12 | 5.08  |
| H  | 1.00  | -0.84 | 4.96  |
| O  | -0.03 | 0.01  | -2.11 |
| H  | -0.41 | -0.35 | -2.88 |

(TMC-OCOCF3)Fe(IV)=O S=1  
ADF/B88P86

|    |       |       |       |
|----|-------|-------|-------|
| Fe | 0.09  | 0.00  | -0.34 |
| N  | 1.52  | -1.61 | -0.33 |
| N  | -1.37 | -1.56 | -0.37 |
| N  | -1.27 | 1.63  | -0.19 |
| N  | 1.61  | 1.51  | -0.16 |
| C  | 0.72  | -2.88 | -0.25 |
| C  | -0.65 | -2.66 | 0.35  |
| C  | -2.59 | -1.24 | 0.44  |
| C  | -3.28 | 0.07  | 0.07  |
| C  | -2.52 | 1.29  | 0.57  |
| C  | -0.50 | 2.60  | 0.64  |
| C  | 0.88  | 2.81  | 0.08  |
| C  | 2.42  | 1.17  | 1.06  |
| C  | 3.18  | -0.16 | 0.99  |
| C  | 2.35  | -1.45 | 0.91  |
| C  | 2.42  | -1.77 | -1.51 |
| C  | -1.79 | -2.02 | -1.72 |
| C  | -1.66 | 2.25  | -1.50 |
| C  | 2.53  | 1.78  | -1.30 |
| H  | 1.28  | -3.63 | 0.34  |
| H  | 0.63  | -3.28 | -1.26 |
| H  | -0.57 | -2.36 | 1.40  |
| H  | -1.24 | -3.60 | 0.29  |
| H  | -2.28 | -1.19 | 1.49  |
| H  | -3.29 | -2.08 | 0.33  |
| H  | -4.26 | 0.07  | 0.59  |
| H  | -3.51 | 0.13  | -1.00 |
| H  | -2.22 | 1.13  | 1.61  |
| H  | -3.17 | 2.18  | 0.54  |
| H  | -1.04 | 3.57  | 0.68  |
| H  | -0.45 | 2.19  | 1.65  |
| H  | 0.82  | 3.33  | -0.89 |
| H  | 1.47  | 3.45  | 0.75  |
| H  | 3.16  | 1.98  | 1.20  |
| H  | 1.74  | 1.16  | 1.92  |
| H  | 3.93  | -0.14 | 0.19  |
| H  | 3.76  | -0.23 | 1.92  |
| H  | 3.04  | -2.31 | 0.95  |
| H  | 1.67  | -1.50 | 1.76  |
| H  | 3.05  | -2.67 | -1.36 |
| H  | 1.83  | -1.90 | -2.42 |
| H  | 3.06  | -0.91 | -1.65 |
| H  | -2.47 | -2.88 | -1.62 |
| H  | -0.92 | -2.31 | -2.32 |
| H  | -2.30 | -1.21 | -2.25 |
| H  | -2.21 | 1.53  | -2.11 |
| H  | -2.29 | 3.13  | -1.31 |
| H  | -0.77 | 2.55  | -2.06 |
| H  | 1.96  | 2.00  | -2.20 |
| H  | 3.18  | 2.63  | -1.05 |
| H  | 3.15  | 0.91  | -1.52 |
| O  | -0.01 | -0.09 | 1.32  |
| O  | -0.04 | 0.10  | -2.33 |
| C  | 0.55  | 0.15  | -3.48 |
| O  | 1.74  | 0.18  | -3.78 |
| C  | -0.45 | 0.17  | -4.70 |
| F  | -1.77 | 0.15  | -4.33 |
| F  | -0.26 | 1.28  | -5.45 |
| F  | -0.24 | -0.92 | -5.49 |

(TMC-OCOCF3)Fe(IV)=O S=1  
Gaussian/B3LYP

|    |       |       |       |
|----|-------|-------|-------|
| Fe | 0.74  | 0.22  | 0.06  |
| N  | 1.10  | -1.22 | 1.60  |
| N  | 0.05  | 1.45  | 1.65  |
| N  | 0.49  | 1.64  | -1.50 |
| N  | 1.56  | -1.03 | -1.50 |
| C  | 0.85  | -0.53 | 2.93  |
| C  | 0.91  | 0.99  | 2.80  |
| C  | 0.33  | 2.92  | 1.44  |
| C  | -0.20 | 3.50  | 0.13  |
| C  | 0.66  | 3.08  | -1.07 |
| C  | 1.66  | 1.32  | -2.41 |
| C  | 1.68  | -0.16 | -2.75 |
| C  | 2.96  | -1.44 | -1.06 |
| C  | 3.01  | -2.30 | 0.22  |
| C  | 2.57  | -1.62 | 1.53  |
| C  | 0.25  | -2.47 | 1.61  |
| C  | -1.41 | 1.28  | 1.99  |
| C  | -0.81 | 1.51  | -2.25 |
| C  | 0.79  | -2.25 | -1.92 |
| H  | 1.58  | -0.87 | 3.67  |
| H  | -0.14 | -0.83 | 3.29  |
| H  | 1.93  | 1.32  | 2.60  |
| H  | 0.57  | 1.46  | 3.73  |
| H  | 1.42  | 3.06  | 1.48  |
| H  | -0.11 | 3.46  | 2.30  |
| H  | -0.13 | 4.60  | 0.20  |
| H  | -1.26 | 3.28  | -0.03 |
| H  | 1.72  | 3.22  | -0.81 |
| H  | 0.44  | 3.71  | -1.94 |
| H  | 1.58  | 1.91  | -3.34 |
| H  | 2.57  | 1.61  | -1.89 |
| H  | 0.84  | -0.42 | -3.41 |
| H  | 2.60  | -0.41 | -3.29 |
| H  | 3.40  | -2.02 | -1.88 |
| H  | 3.54  | -0.53 | -0.91 |
| H  | 2.48  | -3.25 | 0.08  |
| H  | 4.06  | -2.57 | 0.36  |
| H  | 2.76  | -2.31 | 2.36  |
| H  | 3.16  | -0.71 | 1.68  |
| H  | 0.54  | -3.10 | 2.45  |
| H  | -0.80 | -2.20 | 1.71  |
| H  | 0.35  | -3.03 | 0.69  |
| H  | -1.64 | 1.88  | 2.89  |
| H  | -1.65 | 0.24  | 2.19  |
| H  | -2.03 | 1.61  | 1.17  |
| H  | -1.64 | 1.74  | -1.59 |
| H  | -0.81 | 2.20  | -3.11 |
| H  | -0.95 | 0.49  | -2.61 |
| H  | -0.21 | -1.97 | -2.24 |
| H  | 1.31  | -2.74 | -2.75 |
| H  | 0.68  | -2.96 | -1.10 |
| O  | 2.23  | 0.88  | 0.31  |
| O  | -1.11 | -0.42 | -0.23 |
| C  | -2.07 | -1.30 | -0.40 |
| O  | -1.99 | -2.52 | -0.64 |
| C  | -3.49 | -0.67 | -0.23 |
| F  | -3.55 | 0.68  | -0.64 |
| F  | -4.47 | -1.35 | -0.93 |
| F  | -3.85 | -0.68 | 1.13  |

(TMC-OCOCF3)Fe(IV)=O S=1  
Gaussian/BP86

|    |       |       |       |
|----|-------|-------|-------|
| Fe | 0.74  | 0.22  | 0.05  |
| N  | 1.08  | -1.16 | 1.64  |
| N  | 0.06  | 1.51  | 1.59  |
| N  | 0.51  | 1.58  | -1.56 |
| N  | 1.57  | -1.11 | -1.45 |
| C  | 0.82  | -0.43 | 2.95  |
| C  | 0.92  | 1.08  | 2.77  |
| C  | 0.37  | 2.98  | 1.34  |
| C  | -0.15 | 3.52  | 0.00  |
| C  | 0.71  | 3.04  | -1.17 |
| C  | 1.68  | 1.21  | -2.46 |
| C  | 1.66  | -0.29 | -2.74 |
| C  | 2.97  | -1.49 | -0.99 |
| C  | 3.02  | -2.29 | 0.32  |
| C  | 2.56  | -1.56 | 1.60  |
| C  | 0.22  | -2.41 | 1.66  |
| C  | -1.40 | 1.37  | 1.94  |
| C  | -0.80 | 1.44  | -2.30 |
| C  | 0.82  | -2.37 | -1.83 |
| H  | 1.54  | -0.77 | 3.72  |
| H  | -0.19 | -0.71 | 3.31  |
| H  | 1.96  | 1.38  | 2.54  |
| H  | 0.59  | 1.60  | 3.69  |
| H  | 1.46  | 3.10  | 1.38  |
| H  | -0.07 | 3.56  | 2.18  |
| H  | -0.07 | 4.62  | 0.03  |
| H  | -1.22 | 3.31  | -0.15 |
| H  | 1.78  | 3.16  | -0.91 |
| H  | 0.51  | 3.65  | -2.08 |
| H  | 1.61  | 1.77  | -3.41 |
| H  | 2.60  | 1.50  | -1.94 |
| H  | 0.80  | -0.56 | -3.37 |
| H  | 2.57  | -0.58 | -3.30 |
| H  | 3.43  | -2.09 | -1.80 |
| H  | 3.54  | -0.55 | -0.87 |
| H  | 2.51  | -3.26 | 0.22  |
| H  | 4.09  | -2.55 | 0.49  |
| H  | 2.74  | -2.22 | 2.47  |
| H  | 3.14  | -0.63 | 1.73  |
| H  | 0.52  | -3.05 | 2.51  |
| H  | -0.84 | -2.12 | 1.79  |
| H  | 0.29  | -2.98 | 0.73  |
| H  | -1.62 | 1.99  | 2.83  |
| H  | -1.66 | 0.33  | 2.15  |
| H  | -2.02 | 1.71  | 1.10  |
| H  | -1.63 | 1.70  | -1.64 |
| H  | -0.80 | 2.11  | -3.18 |
| H  | -0.95 | 0.40  | -2.62 |
| H  | -0.23 | -2.13 | -2.07 |
| H  | 1.31  | -2.83 | -2.71 |
| H  | 0.81  | -3.10 | -1.02 |
| O  | 2.25  | 0.89  | 0.28  |
| O  | -1.12 | -0.41 | -0.21 |
| C  | -2.09 | -1.29 | -0.39 |
| O  | -2.02 | -2.52 | -0.65 |
| C  | -3.52 | -0.66 | -0.20 |
| F  | -3.59 | 0.70  | -0.62 |
| F  | -4.51 | -1.35 | -0.90 |
| F  | -3.87 | -0.67 | 1.18  |

**(TMC-OCOCF3)Fe(IV)=O S=2**  
**Gaussian/BP86**

|    |       |       |       |
|----|-------|-------|-------|
| Fe | 0.68  | 0.27  | 0.04  |
| N  | 1.16  | -1.03 | 1.79  |
| N  | -0.06 | 1.67  | 1.61  |
| N  | 0.43  | 1.48  | -1.77 |
| N  | 1.67  | -1.20 | -1.43 |
| C  | 0.86  | -0.18 | 3.03  |
| C  | 0.86  | 1.33  | 2.75  |
| C  | 0.18  | 3.10  | 1.15  |
| C  | -0.37 | 3.43  | -0.25 |
| C  | 0.53  | 2.96  | -1.42 |
| C  | 1.65  | 1.09  | -2.58 |
| C  | 1.74  | -0.43 | -2.75 |
| C  | 3.07  | -1.42 | -0.89 |
| C  | 3.14  | -2.11 | 0.50  |
| C  | 2.66  | -1.31 | 1.73  |
| C  | 0.37  | -2.31 | 1.90  |
| C  | -1.51 | 1.50  | 2.01  |
| C  | -0.84 | 1.22  | -2.53 |
| C  | 1.02  | -2.53 | -1.74 |
| H  | 1.59  | -0.41 | 3.82  |
| H  | -0.13 | -0.49 | 3.41  |
| H  | 1.87  | 1.67  | 2.47  |
| H  | 0.55  | 1.86  | 3.67  |
| H  | 1.27  | 3.27  | 1.17  |
| H  | -0.28 | 3.78  | 1.90  |
| H  | -0.43 | 4.54  | -0.32 |
| H  | -1.41 | 3.08  | -0.38 |
| H  | 1.58  | 3.17  | -1.16 |
| H  | 0.28  | 3.54  | -2.33 |
| H  | 1.61  | 1.57  | -3.58 |
| H  | 2.54  | 1.47  | -2.04 |
| H  | 0.91  | -0.79 | -3.38 |
| H  | 2.68  | -0.68 | -3.28 |
| H  | 3.63  | -2.05 | -1.62 |
| H  | 3.56  | -0.43 | -0.83 |
| H  | 2.67  | -3.11 | 0.46  |
| H  | 4.22  | -2.31 | 0.68  |
| H  | 2.93  | -1.89 | 2.64  |
| H  | 3.17  | -0.34 | 1.76  |
| H  | 0.70  | -2.89 | 2.79  |
| H  | -0.70 | -2.08 | 2.00  |
| H  | 0.50  | -2.93 | 1.01  |
| H  | -1.74 | 2.17  | 2.86  |
| H  | -1.71 | 0.46  | 2.29  |
| H  | -2.16 | 1.74  | 1.16  |
| H  | -1.71 | 1.53  | -1.94 |
| H  | -0.83 | 1.78  | -3.49 |
| H  | -0.94 | 0.14  | -2.74 |
| H  | -0.01 | -2.39 | -2.09 |
| H  | 1.61  | -3.06 | -2.52 |
| H  | 0.98  | -3.17 | -0.85 |
| O  | 2.15  | 1.04  | 0.22  |
| O  | -1.15 | -0.37 | -0.14 |
| C  | -2.02 | -1.36 | -0.31 |
| O  | -1.81 | -2.58 | -0.51 |
| C  | -3.50 | -0.84 | -0.18 |
| F  | -3.67 | 0.46  | -0.72 |
| F  | -4.42 | -1.67 | -0.82 |
| F  | -3.86 | -0.76 | 1.19  |

**(N4Py)Fe(IV)=OS=1**  
**ADF/B88P86**

|    |       |       |       |
|----|-------|-------|-------|
| Fe | -0.07 | 0.00  | 0.53  |
| N  | -1.45 | -1.35 | 0.11  |
| N  | -1.42 | 1.42  | 0.21  |
| N  | 1.38  | 1.35  | 0.44  |
| N  | 1.37  | -1.35 | 0.33  |
| N  | 0.13  | 0.08  | -1.54 |
| C  | -2.31 | -1.87 | 1.02  |
| C  | -3.30 | -2.78 | 0.65  |
| C  | -3.42 | -3.14 | -0.69 |
| C  | -2.54 | -2.60 | -1.63 |
| C  | -1.56 | -1.71 | -1.20 |
| C  | -0.50 | -1.14 | -2.13 |
| C  | -2.26 | 1.90  | 1.16  |
| C  | -3.22 | 2.85  | 0.86  |
| C  | -3.33 | 3.33  | -0.44 |
| C  | -2.47 | 2.84  | -1.42 |
| C  | -1.51 | 1.88  | -1.06 |
| C  | -0.49 | 1.35  | -2.04 |
| C  | 1.70  | 2.30  | 1.35  |
| C  | 2.74  | 3.20  | 1.12  |
| C  | 3.47  | 3.11  | -0.06 |
| C  | 3.14  | 2.13  | -1.00 |
| C  | 2.09  | 1.26  | -0.71 |
| C  | 1.65  | 0.08  | -1.56 |
| C  | 1.68  | -2.37 | 1.16  |
| C  | 2.72  | -3.25 | 0.86  |
| C  | 3.45  | -3.07 | -0.32 |
| C  | 3.13  | -2.01 | -1.17 |
| C  | 2.08  | -1.17 | -0.81 |
| H  | -2.17 | -1.54 | 2.04  |
| H  | -3.97 | -3.18 | 1.41  |
| H  | -4.20 | -3.84 | -1.01 |
| H  | -2.61 | -2.87 | -2.68 |
| H  | 0.28  | -1.90 | -2.27 |
| H  | -0.92 | -0.92 | -3.11 |
| H  | -2.12 | 1.49  | 2.16  |
| H  | -3.87 | 3.22  | 1.66  |
| H  | -4.08 | 4.08  | -0.70 |
| H  | -2.52 | 3.19  | -2.45 |
| H  | -0.93 | 1.20  | -3.03 |
| H  | 0.31  | 2.11  | -2.16 |
| H  | 1.10  | 2.30  | 2.26  |
| H  | 2.98  | 3.94  | 1.88  |
| H  | 4.29  | 3.80  | -0.26 |
| H  | 3.70  | 2.03  | -1.94 |
| H  | 2.06  | 0.12  | -2.58 |
| H  | 1.08  | -2.46 | 2.06  |
| H  | 2.95  | -4.06 | 1.55  |
| H  | 4.27  | -3.75 | -0.57 |
| H  | 3.68  | -1.84 | -2.10 |
| O  | -0.25 | -0.05 | 2.18  |

**(N4Py)Fe(IV)=O S=1**  
**excited state; ADF/B88P86**

|    |       |       |       |
|----|-------|-------|-------|
| Fe | -0.08 | 0.01  | 0.51  |
| N  | -1.45 | -1.38 | 0.11  |
| N  | -1.43 | 1.44  | 0.21  |
| N  | 1.41  | 1.35  | 0.45  |
| N  | 1.39  | -1.35 | 0.33  |
| N  | 0.13  | 0.09  | -1.56 |
| C  | -2.29 | -1.90 | 1.03  |
| C  | -3.30 | -2.79 | 0.66  |
| C  | -3.44 | -3.12 | -0.69 |
| C  | -2.56 | -2.58 | -1.63 |
| C  | -1.56 | -1.70 | -1.20 |
| C  | -0.51 | -1.14 | -2.13 |
| C  | -2.26 | 1.92  | 1.17  |
| C  | -3.23 | 2.86  | 0.87  |
| C  | -3.35 | 3.32  | -0.45 |
| C  | -2.49 | 2.82  | -1.43 |
| C  | -1.52 | 1.88  | -1.07 |
| C  | -0.49 | 1.36  | -2.05 |
| C  | 1.72  | 2.27  | 1.37  |
| C  | 2.76  | 3.17  | 1.15  |
| C  | 3.48  | 3.10  | -0.05 |
| C  | 3.15  | 2.13  | -1.00 |
| C  | 2.10  | 1.26  | -0.72 |
| C  | 1.65  | 0.08  | -1.57 |
| C  | 1.71  | -2.35 | 1.17  |
| C  | 2.74  | -3.24 | 0.88  |
| C  | 3.46  | -3.07 | -0.31 |
| C  | 3.13  | -2.02 | -1.18 |
| C  | 2.09  | -1.17 | -0.82 |
| H  | -2.10 | -1.58 | 2.06  |
| H  | -3.96 | -3.20 | 1.42  |
| H  | -4.23 | -3.81 | -1.01 |
| H  | -2.65 | -2.83 | -2.69 |
| H  | 0.27  | -1.90 | -2.28 |
| H  | -0.94 | -0.92 | -3.12 |
| H  | -2.09 | 1.51  | 2.16  |
| H  | -3.89 | 3.22  | 1.66  |
| H  | -4.12 | 4.05  | -0.71 |
| H  | -2.56 | 3.17  | -2.46 |
| H  | -0.93 | 1.22  | -3.04 |
| H  | 0.31  | 2.12  | -2.15 |
| H  | 1.13  | 2.26  | 2.28  |
| H  | 3.01  | 3.92  | 1.90  |
| H  | 4.30  | 3.79  | -0.24 |
| H  | 3.70  | 2.04  | -1.94 |
| H  | 2.07  | 0.12  | -2.59 |
| H  | 1.11  | -2.41 | 2.09  |
| H  | 2.98  | -4.04 | 1.57  |
| H  | 4.28  | -3.75 | -0.56 |
| H  | 3.68  | -1.86 | -2.11 |
| O  | -0.32 | -0.04 | 2.22  |

**(N4Py)Fe(IV)=O S=1**  
**Gaussian/B3LYP**

|    |       |       |       |
|----|-------|-------|-------|
| Fe | 0.08  | 0.00  | -0.63 |
| N  | 1.44  | -1.39 | -0.31 |
| N  | 1.44  | 1.39  | -0.31 |
| N  | -1.37 | 1.36  | -0.49 |
| N  | -1.37 | -1.36 | -0.49 |
| N  | -0.10 | 0.00  | 1.43  |
| C  | 2.27  | -1.89 | -1.27 |
| C  | 3.25  | -2.84 | -0.96 |
| C  | 3.39  | -3.27 | 0.37  |
| C  | 2.53  | -2.76 | 1.36  |
| C  | 1.56  | -1.82 | 0.99  |
| C  | 0.54  | -1.26 | 1.97  |
| C  | 2.27  | 1.89  | -1.27 |
| C  | 3.25  | 2.84  | -0.96 |
| C  | 3.39  | 3.27  | 0.37  |
| C  | 2.53  | 2.75  | 1.36  |
| C  | 1.56  | 1.81  | 0.99  |
| C  | 0.54  | 1.26  | 1.97  |
| C  | -1.69 | 2.32  | -1.38 |
| C  | -2.75 | 3.21  | -1.13 |
| C  | -3.47 | 3.10  | 0.07  |
| C  | -3.14 | 2.08  | 0.99  |
| C  | -2.08 | 1.22  | 0.68  |
| C  | -1.63 | 0.00  | 1.48  |
| C  | -1.69 | -2.32 | -1.38 |
| C  | -2.75 | -3.21 | -1.13 |
| C  | -3.48 | -3.09 | 0.07  |
| C  | -3.14 | -2.08 | 0.99  |
| C  | -2.08 | -1.22 | 0.68  |
| H  | 2.12  | -1.51 | -2.27 |
| H  | 3.90  | -3.21 | -1.75 |
| H  | 4.15  | -4.00 | 0.63  |
| H  | 2.61  | -3.08 | 2.39  |
| H  | -0.24 | -2.01 | 2.14  |
| H  | 1.01  | -1.07 | 2.94  |
| H  | 2.12  | 1.51  | -2.27 |
| H  | 3.89  | 3.22  | -1.75 |
| H  | 4.15  | 4.00  | 0.63  |
| H  | 2.61  | 3.08  | 2.39  |
| H  | 1.01  | 1.06  | 2.94  |
| H  | -0.24 | 2.01  | 2.14  |
| H  | -1.10 | 2.36  | -2.29 |
| H  | -2.99 | 3.98  | -1.86 |
| H  | -4.29 | 3.78  | 0.29  |
| H  | -3.69 | 1.96  | 1.92  |
| H  | -2.03 | 0.00  | 2.50  |
| H  | -1.10 | -2.36 | -2.29 |
| H  | -3.00 | -3.97 | -1.86 |
| H  | -4.29 | -3.77 | 0.28  |
| H  | -3.69 | -1.96 | 1.92  |
| O  | 0.21  | 0.00  | -2.28 |

(N4Py)Fe(IV)=O S=1  
Gaussian/BP86

|    |       |       |       |
|----|-------|-------|-------|
| Fe | 0.07  | 0.00  | -0.62 |
| N  | 1.43  | -1.38 | -0.30 |
| N  | 1.43  | 1.38  | -0.30 |
| N  | -1.36 | 1.35  | -0.48 |
| N  | -1.37 | -1.35 | -0.48 |
| N  | -0.10 | 0.00  | 1.45  |
| C  | 2.26  | -1.87 | -1.28 |
| C  | 3.25  | -2.82 | -0.98 |
| C  | 3.40  | -3.27 | 0.35  |
| C  | 2.54  | -2.76 | 1.35  |
| C  | 1.56  | -1.81 | 1.00  |
| C  | 0.54  | -1.27 | 1.99  |
| C  | 2.26  | 1.87  | -1.28 |
| C  | 3.25  | 2.83  | -0.98 |
| C  | 3.40  | 3.27  | 0.35  |
| C  | 2.55  | 2.76  | 1.36  |
| C  | 1.56  | 1.81  | 1.00  |
| C  | 0.54  | 1.27  | 1.99  |
| C  | -1.68 | 2.31  | -1.39 |
| C  | -2.74 | 3.21  | -1.15 |
| C  | -3.48 | 3.11  | 0.05  |
| C  | -3.14 | 2.09  | 0.99  |
| C  | -2.09 | 1.22  | 0.69  |
| C  | -1.64 | 0.00  | 1.50  |
| C  | -1.68 | -2.31 | -1.39 |
| C  | -2.74 | -3.21 | -1.15 |
| C  | -3.48 | -3.11 | 0.05  |
| C  | -3.15 | -2.09 | 0.99  |
| C  | -2.09 | -1.22 | 0.69  |
| H  | 2.09  | -1.48 | -2.29 |
| H  | 3.90  | -3.20 | -1.78 |
| H  | 4.17  | -4.00 | 0.61  |
| H  | 2.64  | -3.09 | 2.39  |
| H  | -0.25 | -2.02 | 2.15  |
| H  | 1.00  | -1.08 | 2.97  |
| H  | 2.09  | 1.48  | -2.29 |
| H  | 3.89  | 3.20  | -1.78 |
| H  | 4.17  | 4.00  | 0.61  |
| H  | 2.64  | 3.09  | 2.39  |
| H  | 1.01  | 1.07  | 2.97  |
| H  | -0.25 | 2.02  | 2.15  |
| H  | -1.08 | 2.33  | -2.31 |
| H  | -2.98 | 3.97  | -1.90 |
| H  | -4.30 | 3.80  | 0.26  |
| H  | -3.70 | 1.99  | 1.93  |
| H  | -2.05 | 0.00  | 2.52  |
| H  | -1.08 | -2.33 | -2.31 |
| H  | -2.98 | -3.97 | -1.90 |
| H  | -4.30 | -3.80 | 0.26  |
| H  | -3.70 | -1.99 | 1.93  |
| O  | 0.21  | 0.00  | -2.28 |

(N4Py)Fe(IV)=O S=2  
Gaussian/B3LYP

|    |       |       |       |
|----|-------|-------|-------|
| Fe | 0.12  | 0.00  | -0.76 |
| N  | 1.52  | -1.48 | -0.35 |
| N  | 1.52  | 1.48  | -0.35 |
| N  | -1.47 | 1.41  | -0.52 |
| N  | -1.47 | -1.41 | -0.52 |
| N  | -0.08 | 0.00  | 1.33  |
| C  | 2.38  | -2.01 | -1.26 |
| C  | 3.37  | -2.93 | -0.89 |
| C  | 3.47  | -3.29 | 0.47  |
| C  | 2.59  | -2.74 | 1.41  |
| C  | 1.61  | -1.83 | 0.97  |
| C  | 0.55  | -1.26 | 1.90  |
| C  | 2.38  | 2.01  | -1.26 |
| C  | 3.37  | 2.93  | -0.89 |
| C  | 3.47  | 3.30  | 0.47  |
| C  | 2.59  | 2.74  | 1.41  |
| C  | 1.61  | 1.83  | 0.97  |
| C  | 0.55  | 1.26  | 1.90  |
| C  | -1.86 | 2.39  | -1.37 |
| C  | -2.93 | 3.25  | -1.04 |
| C  | -3.59 | 3.07  | 0.18  |
| C  | -3.18 | 2.04  | 1.06  |
| C  | -2.11 | 1.23  | 0.67  |
| C  | -1.61 | 0.00  | 1.43  |
| C  | -1.86 | -2.39 | -1.37 |
| C  | -2.93 | -3.25 | -1.04 |
| C  | -3.59 | -3.07 | 0.18  |
| C  | -3.18 | -2.04 | 1.06  |
| C  | -2.11 | -1.23 | 0.67  |
| H  | 2.25  | -1.68 | -2.29 |
| H  | 4.03  | -3.34 | -1.64 |
| H  | 4.24  | -4.00 | 0.79  |
| H  | 2.65  | -3.01 | 2.46  |
| H  | -0.23 | -2.01 | 2.04  |
| H  | 0.98  | -1.06 | 2.89  |
| H  | 2.25  | 1.68  | -2.29 |
| H  | 4.03  | 3.34  | -1.64 |
| H  | 4.24  | 4.00  | 0.79  |
| H  | 2.65  | 3.01  | 2.46  |
| H  | 0.98  | 1.06  | 2.89  |
| H  | -0.23 | 2.01  | 2.04  |
| H  | -1.31 | 2.48  | -2.30 |
| H  | -3.23 | 4.02  | -1.74 |
| H  | -4.42 | 3.72  | 0.46  |
| H  | -3.68 | 1.89  | 2.01  |
| H  | -1.95 | 0.00  | 2.47  |
| H  | -1.31 | -2.48 | -2.30 |
| H  | -3.23 | -4.02 | -1.74 |
| H  | -4.42 | -3.72 | 0.46  |
| H  | -3.68 | -1.89 | 2.01  |
| O  | 0.27  | 0.00  | -2.39 |

(N4Py)Fe(IV)=O S=2  
Gaussian/BP86

|    |       |       |       |
|----|-------|-------|-------|
| Fe | 0.12  | 0.00  | -0.75 |
| N  | 1.52  | -1.48 | -0.35 |
| N  | 1.52  | 1.48  | -0.35 |
| N  | -1.47 | 1.41  | -0.52 |
| N  | -1.47 | -1.41 | -0.52 |
| N  | -0.08 | 0.00  | 1.34  |
| C  | 2.38  | -2.01 | -1.27 |
| C  | 3.38  | -2.92 | -0.90 |
| C  | 3.50  | -3.29 | 0.46  |
| C  | 2.61  | -2.73 | 1.41  |
| C  | 1.62  | -1.83 | 0.98  |
| C  | 0.55  | -1.27 | 1.91  |
| C  | 2.38  | 2.01  | -1.27 |
| C  | 3.38  | 2.92  | -0.90 |
| C  | 3.50  | 3.29  | 0.46  |
| C  | 2.61  | 2.73  | 1.41  |
| C  | 1.62  | 1.83  | 0.98  |
| C  | 0.55  | 1.27  | 1.91  |
| C  | -1.86 | 2.39  | -1.38 |
| C  | -2.94 | 3.25  | -1.06 |
| C  | -3.61 | 3.08  | 0.18  |
| C  | -3.19 | 2.05  | 1.07  |
| C  | -2.12 | 1.23  | 0.68  |
| C  | -1.62 | 0.00  | 1.44  |
| C  | -1.86 | -2.39 | -1.38 |
| C  | -2.94 | -3.25 | -1.06 |
| C  | -3.61 | -3.08 | 0.18  |
| C  | -3.19 | -2.05 | 1.07  |
| C  | -2.12 | -1.23 | 0.68  |
| H  | 2.23  | -1.68 | -2.31 |
| H  | 4.05  | -3.34 | -1.66 |
| H  | 4.28  | -3.99 | 0.78  |
| H  | 2.69  | -3.01 | 2.47  |
| H  | -0.24 | -2.02 | 2.03  |
| H  | 0.97  | -1.07 | 2.91  |
| H  | 2.23  | 1.68  | -2.31 |
| H  | 4.05  | 3.34  | -1.66 |
| H  | 4.28  | 3.99  | 0.78  |
| H  | 2.69  | 3.01  | 2.47  |
| H  | 0.97  | 1.07  | 2.91  |
| H  | -0.24 | 2.02  | 2.03  |
| H  | -1.31 | 2.47  | -2.32 |
| H  | -3.25 | 4.03  | -1.76 |
| H  | -4.44 | 3.74  | 0.45  |
| H  | -3.70 | 1.90  | 2.03  |
| H  | -1.96 | 0.00  | 2.49  |
| H  | -1.31 | -2.47 | -2.32 |
| H  | -3.25 | -4.03 | -1.76 |
| H  | -4.44 | -3.74 | 0.45  |
| H  | -3.70 | -1.90 | 2.03  |
| O  | 0.28  | 0.00  | -2.40 |



**(N4Py)Fe(III)-OH S=1/2**  
**Gaussian/B3LYP**

|    |       |       |       |
|----|-------|-------|-------|
| Fe | 0.06  | 0.00  | -0.60 |
| N  | 1.45  | -1.37 | -0.28 |
| N  | 1.45  | 1.37  | -0.28 |
| N  | -1.40 | 1.36  | -0.49 |
| N  | -1.39 | -1.36 | -0.49 |
| C  | 2.30  | -1.83 | -1.24 |
| C  | 3.30  | -2.76 | -0.93 |
| C  | 3.43  | -3.21 | 0.41  |
| C  | 2.54  | -2.71 | 1.39  |
| C  | 1.55  | -1.79 | 1.01  |
| C  | 2.30  | 1.83  | -1.24 |
| C  | 3.30  | 2.77  | -0.93 |
| C  | 3.42  | 3.21  | 0.40  |
| C  | 2.54  | 2.72  | 1.39  |
| C  | 1.55  | 1.80  | 1.01  |
| C  | -1.68 | 2.36  | -1.36 |
| C  | -2.73 | 3.27  | -1.10 |
| C  | -3.48 | 3.13  | 0.09  |
| C  | -3.16 | 2.09  | 0.99  |
| C  | -2.12 | 1.22  | 0.66  |
| C  | -1.68 | -2.37 | -1.36 |
| C  | -2.72 | -3.27 | -1.10 |
| C  | -3.47 | -3.13 | 0.09  |
| C  | -3.16 | -2.09 | 0.99  |
| C  | -2.11 | -1.22 | 0.66  |
| H  | 2.14  | -1.44 | -2.24 |
| H  | 3.96  | -3.12 | -1.70 |
| H  | 4.20  | -3.92 | 0.68  |
| H  | 2.62  | -3.04 | 2.42  |
| H  | 2.14  | 1.44  | -2.24 |
| H  | 3.96  | 3.13  | -1.70 |
| H  | 4.19  | 3.92  | 0.68  |
| H  | 2.62  | 3.05  | 2.42  |
| H  | -1.07 | 2.44  | -2.25 |
| H  | -2.95 | 4.05  | -1.81 |
| H  | -4.29 | 3.82  | 0.31  |
| H  | -3.72 | 1.97  | 1.91  |
| H  | -1.06 | -2.44 | -2.25 |
| H  | -2.94 | -4.06 | -1.81 |
| H  | -4.28 | -3.82 | 0.31  |
| H  | -3.72 | -1.97 | 1.91  |
| N  | -0.14 | 0.00  | 1.42  |
| C  | 0.51  | -1.26 | 1.97  |
| C  | 0.51  | 1.26  | 1.97  |
| C  | -1.67 | 0.00  | 1.47  |
| H  | -0.27 | -2.02 | 2.12  |
| H  | 0.95  | -1.06 | 2.96  |
| H  | 0.95  | 1.07  | 2.96  |
| H  | -0.27 | 2.02  | 2.12  |
| H  | -2.07 | 0.00  | 2.48  |
| O  | 0.31  | 0.00  | -2.40 |
| H  | -0.48 | 0.00  | -2.98 |

**(N4Py)Fe(III)-OH S=5/2**  
**Gaussian/B3LYP**

|    |       |       |       |
|----|-------|-------|-------|
| Fe | 0.11  | 0.00  | 0.88  |
| N  | 1.53  | 1.48  | 0.32  |
| N  | 1.53  | -1.48 | 0.32  |
| N  | -1.49 | -1.43 | 0.51  |
| N  | -1.49 | 1.43  | 0.51  |
| C  | 2.42  | 2.02  | 1.21  |
| C  | 3.41  | 2.92  | 0.81  |
| C  | 3.49  | 3.27  | -0.56 |
| C  | 2.58  | 2.71  | -1.47 |
| C  | 1.60  | 1.82  | -1.00 |
| C  | 2.42  | -2.01 | 1.21  |
| C  | 3.41  | -2.92 | 0.81  |
| C  | 3.49  | -3.27 | -0.56 |
| C  | 2.58  | -2.71 | -1.47 |
| C  | 1.60  | -1.82 | -1.00 |
| C  | -1.87 | -2.44 | 1.32  |
| C  | -2.93 | -3.30 | 0.97  |
| C  | -3.59 | -3.10 | -0.26 |
| C  | -3.18 | -2.05 | -1.10 |
| C  | -2.12 | -1.23 | -0.68 |
| C  | -1.88 | 2.44  | 1.32  |
| C  | -2.93 | 3.30  | 0.97  |
| C  | -3.59 | 3.10  | -0.26 |
| C  | -3.18 | 2.05  | -1.10 |
| C  | -2.12 | 1.23  | -0.68 |
| H  | 2.31  | 1.70  | 2.24  |
| H  | 4.10  | 3.33  | 1.54  |
| H  | 4.26  | 3.96  | -0.90 |
| H  | 2.63  | 2.96  | -2.52 |
| H  | 2.31  | -1.70 | 2.24  |
| H  | 4.10  | -3.33 | 1.54  |
| H  | 4.26  | -3.96 | -0.90 |
| H  | 2.63  | -2.96 | -2.52 |
| H  | -1.34 | -2.56 | 2.26  |
| H  | -3.23 | -4.10 | 1.64  |
| H  | -4.41 | -3.75 | -0.55 |
| H  | -3.67 | -1.88 | -2.05 |
| H  | -1.34 | 2.56  | 2.26  |
| H  | -3.23 | 4.10  | 1.64  |
| H  | -4.41 | 3.75  | -0.55 |
| H  | -3.67 | 1.87  | -2.05 |
| N  | -0.10 | 0.00  | -1.38 |
| C  | 0.53  | 1.25  | -1.92 |
| C  | 0.53  | -1.25 | -1.92 |
| C  | -1.62 | 0.00  | -1.44 |
| H  | -0.25 | 2.01  | -2.05 |
| H  | 0.95  | 1.07  | -2.92 |
| H  | 0.95  | -1.07 | -2.92 |
| H  | -0.25 | -2.02 | -2.05 |
| H  | -2.00 | 0.00  | -2.47 |
| O  | 0.26  | 0.00  | 2.67  |
| H  | 0.15  | 0.00  | 3.63  |

**(N4Py)Fe(III)-OH S=1/2**  
**Gaussian/BP86**

|    |       |       |       |
|----|-------|-------|-------|
| Fe | 0.05  | 0.00  | -0.58 |
| N  | 1.43  | -1.35 | -0.28 |
| N  | 1.43  | 1.35  | -0.28 |
| N  | -1.38 | 1.35  | -0.49 |
| N  | -1.38 | -1.35 | -0.49 |
| C  | 2.28  | -1.82 | -1.25 |
| C  | 3.29  | -2.75 | -0.94 |
| C  | 3.43  | -3.21 | 0.39  |
| C  | 2.55  | -2.72 | 1.39  |
| C  | 1.55  | -1.80 | 1.02  |
| C  | 2.28  | 1.82  | -1.25 |
| C  | 3.29  | 2.75  | -0.94 |
| C  | 3.43  | 3.21  | 0.39  |
| C  | 2.55  | 2.72  | 1.39  |
| C  | 1.55  | 1.80  | 1.02  |
| C  | -1.64 | 2.37  | -1.36 |
| C  | -2.69 | 3.28  | -1.12 |
| C  | -3.46 | 3.15  | 0.06  |
| C  | -3.17 | 2.11  | 0.98  |
| C  | -2.12 | 1.22  | 0.67  |
| C  | -1.64 | -2.37 | -1.36 |
| C  | -2.69 | -3.28 | -1.12 |
| C  | -3.46 | -3.15 | 0.06  |
| C  | -3.17 | -2.11 | 0.98  |
| C  | -2.12 | -1.22 | 0.67  |
| H  | 2.12  | -1.42 | -2.25 |
| H  | 3.96  | -3.10 | -1.73 |
| H  | 4.22  | -3.92 | 0.66  |
| H  | 2.63  | -3.06 | 2.42  |
| H  | 2.12  | 1.42  | -2.25 |
| H  | 3.96  | 3.11  | -1.73 |
| H  | 4.21  | 3.92  | 0.66  |
| H  | 2.63  | 3.06  | 2.42  |
| H  | -1.01 | 2.43  | -2.25 |
| H  | -2.89 | 4.08  | -1.84 |
| H  | -4.28 | 3.86  | 0.27  |
| H  | -3.74 | 1.99  | 1.90  |
| H  | -1.01 | -2.43 | -2.25 |
| H  | -2.89 | -4.08 | -1.84 |
| H  | -4.27 | -3.86 | 0.27  |
| H  | -3.74 | -1.99 | 1.90  |
| N  | -0.14 | 0.00  | 1.43  |
| C  | 0.50  | -1.27 | 1.99  |
| C  | 0.50  | 1.27  | 1.99  |
| C  | -1.69 | 0.00  | 1.48  |
| H  | -0.29 | -2.03 | 2.12  |
| H  | 0.93  | -1.08 | 2.98  |
| H  | 0.93  | 1.08  | 2.98  |
| H  | -0.29 | 2.03  | 2.12  |
| H  | -2.10 | 0.00  | 2.50  |
| O  | 0.28  | 0.00  | -2.38 |
| H  | -0.55 | 0.00  | -2.93 |

**(N4Py)Fe(III)-OH S=5/2**  
**Gaussian/BP86**

|    |       |       |       |
|----|-------|-------|-------|
| Fe | 0.11  | 0.00  | 0.89  |
| C  | -2.13 | 1.23  | -0.69 |
| N  | -1.49 | 1.44  | 0.51  |
| C  | -1.89 | 2.46  | 1.33  |
| C  | -2.95 | 3.32  | 0.97  |
| C  | -3.61 | 3.11  | -0.26 |
| C  | -3.20 | 2.06  | -1.11 |
| C  | -1.63 | 0.00  | -1.45 |
| N  | -0.11 | 0.00  | -1.38 |
| C  | 0.52  | -1.26 | -1.92 |
| C  | 1.61  | -1.81 | -1.00 |
| N  | 1.53  | -1.48 | 0.32  |
| C  | 2.43  | -2.01 | 1.22  |
| C  | 3.44  | -2.90 | 0.81  |
| C  | 3.53  | -3.24 | -0.56 |
| C  | 2.61  | -2.69 | -1.48 |
| N  | 1.53  | 1.48  | 0.32  |
| C  | 2.43  | 2.01  | 1.22  |
| C  | 3.44  | 2.90  | 0.81  |
| C  | 3.53  | 3.25  | -0.56 |
| C  | 2.61  | 2.69  | -1.48 |
| C  | 1.61  | 1.81  | -1.00 |
| C  | 0.52  | 1.26  | -1.92 |
| N  | -1.49 | -1.44 | 0.51  |
| C  | -1.89 | -2.46 | 1.33  |
| C  | -2.95 | -3.32 | 0.97  |
| C  | -3.61 | -3.11 | -0.26 |
| C  | -3.20 | -2.06 | -1.11 |
| C  | -2.13 | -1.23 | -0.69 |
| H  | 2.31  | 1.70  | 2.26  |
| H  | 4.13  | 3.31  | 1.55  |
| H  | 4.31  | 3.93  | -0.91 |
| H  | 2.66  | 2.94  | -2.54 |
| H  | 2.31  | -1.70 | 2.26  |
| H  | 4.13  | -3.31 | 1.55  |
| H  | 4.31  | -3.93 | -0.91 |
| H  | 2.66  | -2.94 | -2.54 |
| H  | -1.34 | -2.57 | 2.27  |
| H  | -3.25 | -4.12 | 1.65  |
| H  | -4.44 | -3.77 | -0.56 |
| H  | -3.69 | -1.88 | -2.07 |
| H  | -1.34 | 2.57  | 2.27  |
| H  | -3.25 | 4.12  | 1.65  |
| H  | -4.44 | 3.77  | -0.56 |
| H  | -3.69 | 1.88  | -2.07 |
| H  | -0.26 | 2.03  | -2.04 |
| H  | 0.94  | 1.08  | -2.94 |
| H  | 0.94  | -1.08 | -2.94 |
| H  | -0.26 | -2.03 | -2.04 |
| H  | -2.01 | 0.00  | -2.49 |
| O  | 0.24  | 0.00  | 2.68  |
| H  | -0.07 | 0.00  | 3.62  |
